1 Title page

2

3 Full title: Deep proteomics network and machine learning analysis of human cerebrospinal fluid in  
4 Japanese encephalitis virus infection

5

6 Short title: Network and machine learning analysis of the CSF proteome in Japanese encephalitis

7

8 Authors:

9 Dr. Tehmina Bharucha<sup>1,2\*</sup>

10 Dr Bevin Gangadharan<sup>1</sup>

11 Dr Abhinav Kumar<sup>1</sup>

12 Mr Ashleigh C. Myall<sup>3,4</sup>

13 Dr Nazli Ayhan<sup>5</sup>

14 Dr Boris Pastorino<sup>5</sup>

15 Ms Anisone Chanthongthip<sup>2</sup>

16 Dr Manivanh Vongsouvath<sup>2</sup>

17 Professor Mayfong Mayxay<sup>2,6,7</sup>

18 Dr Onanong Sengvilaipaseuth<sup>2</sup>

19 Ms Ooyanong Phonemixay<sup>2</sup>

20 Dr Sayaphet Rattanavong<sup>2</sup>

21 Dr Darragh P. O'Brien<sup>8,9</sup>

22 Dr Iolanda Vendrell<sup>8,9</sup>

23 Associate Professor Roman Fischer<sup>8,9</sup>

24 Professor Benedikt Kessler<sup>8,9</sup>

25 Dr Lance Turtle<sup>10,11</sup>

26 SEAE collaborators

27 Professor Xavier de Lamballerie<sup>3</sup>

28 Dr Audrey Dubot-Peres<sup>2,3,5</sup>

29 Professor Paul N. Newton<sup>2,5</sup>

30 Professor Nicole Zitzmann<sup>1</sup>

31

32 Affiliations:

33 1. Oxford Glycobiology Institute, Department of Biochemistry, University of Oxford, UK

34 2. Lao-Oxford-Mahosot Hospital-Wellcome Trust Research Unit (LOMWRU), Microbiology

35 Laboratory, Mahosot Hospital, Vientiane, Lao PDR

36 3. Department of Infectious Disease, Imperial College London, London, UK

37 4. Department of Mathematics, Imperial College London, London, UK

38 5. Unité Des Virus Emergents UVE, Aix Marseille Univ, IRD190, INSERM 1207, IHU

39 Méditerranée Infection, Marseille, France

40 6. Institute of Research and Education Development (IRED), University of Health Sciences,

41 Ministry of Health, Vientiane, Lao PDR

42 7. Centre for Tropical Medicine & Global Health, Nuffield Department of Medicine, University

43 of Oxford, Oxford, UK

44 8. Target Discovery Institute, Centre for Medicines Discovery, Nuffield Department of

45 Medicine, University of Oxford, UK

- 46 9. Chinese Academy of Medical Sciences Oxford Institute, Nuffield Department of Medicine,  
47 University of Oxford, UK
- 48 10. Institute of Infection, Veterinary and Ecological Sciences, Faculty of Health and Life  
49 Sciences, University of Liverpool, Liverpool, UK
- 50 11. Tropical and Infectious Disease Unit, Liverpool University Hospitals NHS Foundation Trust  
51 (member of Liverpool Health Partners), Liverpool, UK
- 52
- 53 \* Corresponding author: Dr Tehmina Bharucha, [t.bharucha@doctors.org.uk](mailto:t.bharucha@doctors.org.uk). Department of  
54 Biochemistry, University of Oxford, and Lao-Oxford-Mahosot Hospital-Wellcome Trust Research  
55 Unit (LOMWRU), Microbiology Laboratory, Mahosot Hospital, Vientiane, Lao PDR. 01865275723.

## 56 Abstract

57

58 Japanese encephalitis virus (JEV) is a mosquito-borne flavivirus, and leading cause of neurological  
59 infection in Asia and the Pacific, with recent emergence in multiple territories in Australia in 2022.  
60 Patients may experience devastating socioeconomic consequences; JEV infection (JE) predominantly  
61 affects children in poor rural areas, has a 20-30% case fatality rate, and 30-50% of survivors suffer  
62 long-term disability. JEV RNA is rarely detected in patient samples, and the standard diagnostic test is  
63 an anti-JEV IgM ELISA with sub-optimal specificity; there is no means of detection in more remote  
64 areas. We aimed to test the hypothesis that there is a diagnostic protein signature of JE in human  
65 cerebrospinal fluid (CSF), and contribute to understanding of the host response and predictors of  
66 outcome during infection.

67 We retrospectively tested a cohort of 163 patients recruited as part of the Laos central nervous system  
68 infection study. Application of liquid chromatography and tandem mass spectrometry (LC-MS/MS),  
69 using extensive offline fractionation and tandem mass tag labelling, enabled a comparison of the CSF  
70 proteome in 68 JE patient vs 95 non-JE neurological infections. 5,070 proteins were identified,  
71 including 4,805 human proteins and 265 pathogen proteins. We incorporated univariate analysis of  
72 differential protein expression, network analysis and machine learning techniques to build a ten-protein  
73 diagnostic signature of JE with >99% diagnostic accuracy. Pathways related to JE infection included  
74 neuronal damage, anti-apoptosis, heat shock and unfolded protein responses, cell adhesion, macrophage  
75 and dendritic cell activation as well as a reduced acute inflammatory response, hepatotoxicity, activation  
76 of coagulation, extracellular matrix and actin regulation. We verified the results by performing DIA LC-  
77 MS/MS in 16 (10%) of the samples, demonstrating 87% accuracy using the same model. Ultimately,  
78 antibody-based validation will be required, in a larger group of patients, in different locations and in  
79 field settings, to refine the list to 2-3 proteins that could be harnessed in a rapid diagnostic test.

## 80 Author summary

81

82 Japanese encephalitis virus (JEV) is a leading cause of brain infection in Asia and the Pacific, with  
83 recent introduction in multiple territories in Australia in 2022. Patients may experience devastating  
84 socioeconomic consequences; JEV infection (JE) predominantly affects children in poor rural areas,  
85 has a 20-30% case fatality rate, and 30-50% of survivors suffer long-term disability. The disease is  
86 difficult to diagnose, and there are no rapid tests that may be performed in remote areas that it exists  
87 such that we remain unclear of the burden of disease and the effects of control measures. We aimed to  
88 apply a relatively novel method to analyse the proteins in patients with JE as compared to other  
89 neurological infections, to see if this could be useful for making a diagnosis.

90 We tested the brain fluid of 163 patients recruited as part of the Laos central nervous system infection  
91 study. We used a method, 'liquid chromatography mass spectrometry' that does not require prior  
92 knowledge of the proteins present, that is you do not target any specific protein. Over 5,000 proteins  
93 were identified, and these were analysed by various methods. We grouped the proteins into different  
94 clusters that provided insight into their function. We also filtered the list to 10 proteins that predicted JE  
95 as compared to other brain infections. Future work will require confirmation of the findings in a larger  
96 group of patients, in different locations and in field settings, to refine the list to 2-3 proteins that could  
97 be harnessed in a rapid diagnostic test.

## 98 Introduction

99

100 Japanese encephalitis virus (JEV) is a mosquito-borne flavivirus, and a leading cause of neurological  
101 infection as Japanese encephalitis (JE) in Asia. It is of considerable public health importance, with  
102 recent estimates based on sparse data suggesting 1.5 billion people at risk with 42,000 cases per year  
103 (1, 2). It is an emerging disease, with recent evidence of JEV in multiple territories in Australia (3).  
104 Patients may experience devastating socioeconomic consequences; JE predominantly affects children  
105 in poor rural areas, has a 20-30% case fatality rate, and 30-50% of survivors suffer long-term  
106 disability (4). Although no specific treatment is available, several vaccines are available and  
107 recommended by the WHO (5, 6). Although recent efforts have strengthened JEV vaccination  
108 programs, still only 15 of 24 endemic countries include JEV vaccine in routine immunisation  
109 policies, and even then, it is not uniformly nationwide, with vaccine coverage in targeted areas  
110 reported to be as low as 39% (7). JEV is a zoonosis, and sustained vaccine coverage is essential to  
111 control disease.

112 A fundamental limitation in the control of JE is the poor accuracy of existing diagnostic tests,  
113 requirement for lumbar puncture and laboratory capacity for diagnosis (8). Surveillance data suggest  
114 that only 11 of 24 countries meet the minimum surveillance standards, equivalent to diagnostic  
115 testing in a sentinel site (7). This is a threat to vaccine implementation, as accessible and accurate  
116 diagnostics are essential to understand epidemiology, effectiveness of vaccination, identify associated  
117 research knowledge gaps and facilitate public engagement. This also has implications for appropriate  
118 risk-assessment for travellers. Aside from JEV control, diagnosis is crucial for patients, families and  
119 health-workers, to be able to institute appropriate supportive and rehabilitation care, stop unnecessary  
120 antibiotics, or if the test is negative to prompt further investigation.

121 The gold-standard JEV test is a neutralisation assay. However this requires paired acute and  
122 convalescent sera, is laborious, time-consuming, requires specialist skills, high-level isolation  
123 facilities for viral cell culture and may not define the infecting virus in secondary flavivirus infections

124 (8). The WHO recommended diagnostic test is anti-JEV IgM antibody capture ELISA (MAC-ELISA)  
125 of cerebrospinal fluid (CSF). There are limited data from field studies comparing CSF MAC ELISA  
126 with neutralisation assays. The manufacturer of the only available commercial kit for clinical  
127 diagnosis (InBios) quotes a sensitivity of >90% for well-characterised CSF samples, but sensitivity in  
128 the field is as low as 53% (9). There are also increasingly recognised problems with specificity  
129 related to prior vaccination and cross-reactivity with other flaviviruses (10, 11). Reported specificity is  
130 >90%, however a study by our group demonstrated that 13% of patients with JE IgM detected in CSF  
131 by MAC-ELISA had another pathogen detected that may have explained the presentation (10).

132 Detection of JEV RNA would be highly specific, but the period of viraemia is brief and hard to  
133 capture clinically, often occurring before the onset of neurological symptoms and signs. RT-qPCR  
134 remains insensitive irrespective of the analytical sensitivity or gene targets (12). For this reason, the  
135 application of metagenomics is not likely to significantly improve JEV RNA detection.

136 Uniquely untargeted and powerful, the application of liquid-chromatography mass-spectrometry (LC-  
137 MS) proteomics techniques to clinical samples represent a relatively novel approach to improve  
138 diagnosis of JE (13, 14). Such an approach is based on the hypothesis that there is a protein signature  
139 in CSF specific for JE, and that this could be harnessed in an antibody-based point-of-care test.

140 Furthermore, deep proteomics exploration provides insights into disease processes and potential  
141 therapeutic targets. Network science and machine learning are two complementary disciplines  
142 enabling insights into complex high dimensional data (15, 16). Networks, comprised of nodes and  
143 links, are naturally attuned to problems where features have a relational structure (17) and have a  
144 track record of success in understanding networks of biological interactions (18). On the other hand,  
145 machine learning can uncover signals in data related to outcome variables and identify predictive  
146 markers of disease, a vital exploratory process for constructing diagnostics (19). Used in conjunction,  
147 network science and machine learning provide novel characterisation of disease states and can  
148 identify robust predictive markers of disease (20).

149 Herein we aimed to test the hypothesis that there is a diagnostic protein signature of JE by performing  
150 LC-MS/MS in patient samples recruited as part of the Laos CNS study, incorporating differential

151 expression, network and machine learning analysis. A subsidiary aim was to utilise the data in the  
152 same workflow to evaluate proteins associated with outcome of JE. We first performed a pilot  
153 feasibility study (n=15) and then in a larger verification study (n=148) including a sample size based  
154 on a power calculation. These data were combined in the final analysis. The results were verified by  
155 performing data independent acquisition (DIA) LC-MS/MS in 16 (10%) of the samples.



## 156 Materials and methods

157

### 158 Patient samples

159 A prospective study of central nervous system (CNS) infection has been conducted at Mahosot  
160 Hospital, Vientiane, Laos, since 2003. Methods and results from 2003-2011 have been described (21).  
161 Patients from 2014-2017 were part of the Southeast Asia Encephalitis Project (22). Inpatients of all  
162 ages were recruited for whom diagnostic lumbar puncture was indicated for suspicion of CNS  
163 infection because of altered consciousness or neurologic findings and for whom lumbar puncture was  
164 not contraindicated. There was no formal definition for CNS infection; patient recruitment was at the  
165 discretion of the responsible physician, reflecting local clinical practice. The laboratory also receives  
166 samples from patients from other hospitals around Vientiane; Friendship, Children's and Setthathirat  
167 Hospitals. Written informed consent was obtained from patients or responsible guardians. Ethical  
168 clearance was granted by the Ethical Review Committee of the Former Faculty of Medical Sciences,  
169 National University of Laos and the Oxford University Tropical Ethics Research Committee. The  
170 confirmed aetiology was determined by the results of a panel of diagnostic tests which included tests  
171 for the direct detection of pathogens in CSF or blood, specific IgM in CSF, seroconversion, or a 4-  
172 fold rise in antibody titre between admission and follow-up serum samples (21). Pathogen detection  
173 was confirmed after critical analysis of test results to rule out possible contamination. Japanese  
174 encephalitis virus infection was confirmed, as recommended by the World Health Organisation, by  
175 detection of anti-JEV IgM by ELISA in CSF or seroconversion in paired serum samples. All anti-JEV  
176 IgM positive samples were subsequently confirmed by the gold standard virus neutralisation assay see  
177 cited reference (23). Power analysis was performed to estimate the sample size that would be required  
178 using different values. A schematic representation of the study methods is illustrated in Figure 1.

179

180 Figure 1: Schematic representation of the study methods

181

## 182 LC-MS sample preparation

183 CSF samples were diluted 1:5 in 9 M urea and vortexed intermittently at room temperature for 30  
184 minutes, to solubilise and denature proteins, inactivating any pathogens and rendering the sample  
185 acellular. Protein concentration was assessed with a Nanodrop assay ND-1000 spectrophotometer  
186 (Thermo Scientific) by measuring the absorbance at 280 nm, normalised by aliquoting different  
187 volumes of each sample dependent on the protein concentration, and then the total volume equalised  
188 with 7.5 M urea. An equal volume of 100 mM dithiothreitol (DTT) in 50 mM ammonium bicarbonate  
189 (AmBic) was added as a reducing agent, and the samples vortexed and incubated at 56°C for 45 min.  
190 An equal volume of 100 mM iodoacetamide (IAA) in 50 mM AmBic was added as an alkylating  
191 agent, vortexed and incubated at room temperature for 1 hr in the dark. 50 mM AmBic was added to  
192 each sample to reduce the urea concentration to below 1M. Digestion was performed with trypsin in a  
193 ratio of 1:20 m:m protein:trypsin (Promega, P/N V5072 for the pilot study; V5117 for the larger  
194 study); first 75% of the total amount of trypsin added and incubated at 37°C for 18 hours overnight  
195 and then the remaining 25% added and incubated at 37.5°C for 6 hours. The samples were frozen at -  
196 20°C to quench the trypsin digestion reaction. A pooled aliquot of each sample was analysed by label-  
197 free LC-MS to verify protein digestion.

198 Reverse phase (RP) C18 solid phase extraction (SPE) was used to desalt the digested proteins, as per  
199 the manufacturers' instructions (Waters P/N WAT023590 for the pilot study; Thermo Scientific P/N  
200 60109-001 for the larger study). The total eluate was dried completely using a vacuum concentrator  
201 (Savant SpeedVac or Eppendorf concentrator) and for the samples to be labelled by Tandem Mass  
202 Tag (TMT), resuspended in 100 mM triethylammonium bicarbonate (TEAB). The samples were  
203 vortexed, centrifuged, sonicated for 3 min, and then this was repeated. The Pierce Quantitative  
204 Colorimetric Peptide Assay (Thermo Scientific, UK) was performed as per the manufacturer's  
205 instructions. The samples were normalised for peptide concentration with TEAB to make up a final  
206 volume of 100 µL required for TMT labelling. TMT labelling was performed as per the  
207 manufacturer's instructions, in two batches of TMT 11-plex (Thermo Scientific, P/N A37724) for the  
208 pilot study and ten batches of 16-plex (Thermo Scientific, P/N A44520) for the larger study. For the

209 larger study, in order to examine technical variability and adjust for batch effects, each batch  
210 contained one reference pool and the batch 9 and 10 had two replicate samples. A pooled sample was  
211 analysed by LC-MS to verify labelling efficiency.

212

### 213 [Offline high pH reverse-phase fractionation](#)

214 For the pilot study, offline high pH reverse-phase fractionation was performed using a Hypersil Gold  
215 column (Thermo Scientific, P/N 25002-202130). The mobile phase A was water adjusted with  
216 ammonium hydroxide to pH 10 and B was 10 mM ammonium bicarbonate in 80% Acetonitrile (ACN)  
217 adjusted with ammonium hydroxide to pH 10 and a flow rate of 300  $\mu\text{L}/\text{min}$ . The samples were  
218 separated into 91 fractions with each fraction collected every 60 seconds from the start of the run and  
219 using the gradient shown in supplementary data (S1 Data). For the larger study, offline high pH reverse-  
220 phase fractionation was performed using an Xbridge BEH C18 column (Waters P/N 186006710). The  
221 mobile phase A was water adjusted to pH 10 with ammonium hydroxide and B was 90% ACN adjusted  
222 to pH 10 with ammonium hydroxide, at a flow rate of 200  $\mu\text{L}/\text{min}$ . Fractions were collected every 60  
223 seconds from the start of the run (100 fractions) and then concatenated into 44 fractions using the  
224 gradient shown in supplementary data (S1 Data). The samples analysed by DIA LC-MS/MS were not  
225 processed by offline fractionation.

226

### 227 [Liquid-chromatography mass-spectrometry](#)

228 Online peptide desalting was performed with a Dionex Ultimate 3000 nano UHPLC (Thermo  
229 Scientific) using 100% of loading mobile phase A = 0.05% TFA in water at a flow rate 10  $\mu\text{L}/\text{min}$  for  
230 4.6 min. The online desalting column (trap column) used was a C18 column (Thermo Scientific P/N  
231 160454). At 4.6 min the flow from the nano pump was diverted to the trap column in a backward  
232 flush direction. For online low-pH reverse-phase fractionation, the trapped peptides were eluted from  
233 the column over the gradient time specified in supplementary data (S1 Data). For the pilot study,  
234 Accucore C18 columns (Thermo Scientific P/N 16126-507569) were used with a nano source, at a

235 flow rate of 250  $\mu$ L/min. For the larger study, EASY-Spray PepMap C18 columns (Thermo Scientific  
236 P/N ES903) were used with an EASY-Spray source, and a flow rate of 300  $\mu$ L/min. Mobile phase A  
237 was 0.1% FA and B was 0.1% FA in 80% ACN. MS was performed with a Q Exactive benchtop  
238 hybrid quadrupole-Orbitrap MS (Thermo Scientific), the settings are described in detail in  
239 supplementary data (S1 Data). For the CSF samples processed by DIA LC-MS/MS, samples were  
240 analysed using a Dionex Ultimate 3000 nano UPLC (Thermo Scientific) coupled to an Orbitrap  
241 Fusion Lumos mass spectrometer (Thermo Scientific). Briefly, peptides were trap on a PepMap C18  
242 trap columns (Thermo) and separated on an EasySpray column (50cm, P/N ES803, Thermo) over a  
243 60-minute linear gradient from 2 % buffer B to 35 % buffer B (A: 5 % DMSO, 0.1 % formic acid in  
244 water. B: 5 % DMSO, 0.1 % formic acid in acetonitrile) at a flow rate of 250 nL/min. The instrument  
245 was operated in data-independent mode as previously described (24).

246

247

## 248 Data processing and statistical analysis

249

250 The sample size was estimated using a power calculation based on a t test and multiple testing  
251 correction, with data from the pilot study and the R package 'FDRsamplerize' (25).

252

253 Protein identification, quantification, missing value imputation and batch correction: Thermo raw files  
254 were imported into Proteome Discoverer v2.5 (Thermo Scientific, UK) for peptide identification  
255 using the SEQUEST algorithm (26) searching against the SwissProt Homo sapiens and pathogen  
256 databases according to the included samples with precursor mass tolerance 10ppm and fragment mass  
257 tolerance 0.02 Da. Carbamidomethylation of cysteine, TMT at N-termini and lysine were set as fixed  
258 modifications, and oxidation of methionine was set as a variable modification. False discovery rate  
259 (FDR) estimation was performed using the Percolator algorithm (27). The criteria for protein  
260 identification included  $FDR < 1\%$ ,  $\geq 2$  peptides per protein,  $\geq 1$  unique peptides per protein,  $\leq 2$   
261 missed cleavages and  $\geq 6$  and  $\leq 144$  peptide length (amino acids), coisolation threshold  $< 50\%$ ,

262 average S/N threshold >10 and at least 2 channels with quantification data. Protein quantification was  
263 performed in R v 4.1.2 with the package MSstatsTMT (28). Proteins with >50% missing data were  
264 removed and the data was imputed with the package DreamAI (29). To incorporate peptide count per  
265 protein, jitter was added proportional to 1/median peptide count for each protein. The pilot and larger  
266 study data were merged, normalised with the package RobNorm (30) and then batch correction was  
267 performed with the function ComBat (31) in the package sva without modifiers as covariates (32).  
268 The protein list was filtered to remove contaminant proteins from the skin or red blood cells, see  
269 supplementary data S5\_contaminants for the list of proteins removed.

270

271 Differential protein expression: Differential expression between the protein abundance in the JE vs.  
272 non-JE patient samples was performed using a t test and Benjamini-Hochberg correction for multiple  
273 testing.

274

275 Network analysis: Weighted correlation network analysis (WGCNA) was performed using the  
276 package WGCNA: constructing a signed weighted co-expression network with a soft power threshold  
277 of 12 to produce a power distribution, that is, scale-free topology; applying hierarchical clustering to  
278 detect modules of highly interconnected proteins with a minimum module size of five, deepSplit 4  
279 and merge threshold 0.3; classifying intramodular hub proteins as the five proteins with the highest  
280 module membership for each module; and then correlating the modules with patient sample data (33).

281

282 Feature selection and predictive modelling: This was implemented with the Boruta algorithm (using  
283 the random forest classifier) using the package Boruta (34) and with Lasso (least absolute shrinkage  
284 and selection operator) regression using the package glmnet (16, 35). A final list of proteins based on  
285 the intersect between Boruta and Lasso were selected (36). Classification of JE vs. non-JE was  
286 performed with selected proteins using a several different machine learning models (random forest,  
287 support vector machine, logistic regression and naïve bayes with the package caret and

288 caretEnsemble) (37). Models were trained using tenfold cross-validation repeated ten times evaluated  
289 on AUC-ROC. An analysis of feature importance was performed to identify proteins that best  
290 predicted the outcome (alive/ died) in JE patients, however due to the small sample size this was  
291 considered an exploratory analysis. Feature selection was performed with Boruta and Lasso, and then  
292 five-fold cross-validation performed on the entire dataset using different machine learning models.  
293 Protein involvement in biological, molecular and cellular processes was explored using gene ontology  
294 using the webserver STRING (38), the R package WebGestaltR 0.4.4 (39), and tissue expression  
295 correlated with the Human Protein Atlas (HPA) (40, 41).

296

297 Data independent acquisition (DIA) data processing: For robustness, final verification was performed  
298 on 10% of the samples independently processed via a separate mass spectrometry pipeline using  
299 label-free DIA LC-MS/MS. DIA data were analysed using DIA-NN software (v0.8) with the library-  
300 free approach as previously described (42), using the default settings as recommended. Briefly, for the  
301 library-free processing, a library was created from human UniProt SwissProt database (downloaded  
302 24/2/21 containing 20,381 sequences) using deep learning. Trypsin was selected as the enzyme (1  
303 missed cleavage), with carboamidomethylation of C as a fixed modification, oxidation of Methionine  
304 as a variable modification and N-term M excision. Identification and quantification of raw data were  
305 performed against the in-silico library applying 1% FDR at precursor level and match between runs  
306 (MBR). The DIA-NN ‘report.proteingroup’ matrix output was further analysed. Missing values were  
307 imputed with half the minimum value for each protein. These data was used as a test set in the  
308 predictive model for the diagnosis of JE. In view of the small numbers of JE patients included in the  
309 test set and missing outcome data for these patients, this was not used to test the predictive model for  
310 JE outcome.

311

## 312 Results

313

### 314 Patient data

315 Power analysis was performed to estimate the sample size that would be required to compare  
316 differential expression of proteins in JE vs non-JE using different values: with 1000-3000 biomarkers  
317 to be tested, 50-150 finally verified, effect size 0.8, power 90%, false discovery rate <5%, the total  
318 sample size with an equal number of JE cases and non-JE controls, was 122. Overall, including the  
319 pilot and larger study, 163 patients were included – 68 JE and 95 Non-JE, see Table 1, supplementary  
320 data S2 and S3.

321

322 Table 1: Summary of included patients' demographics, clinical presentations and details of diagnosis.

323

324 JE patients were confirmed by the assays with the highest diagnostic confidence; detection of JEV  
325 RNA, or detection of JEV IgM in CSF or by seroconversion and confirmed by virus neutralisation  
326 tests (VNT). Non-JE patients included a range of different categories of infection that are common in  
327 the region. None of the patients had dual infections. Details of patient demographics, clinical  
328 presentations, laboratory investigations and outcome are reported in supplementary data S1 and S2.

329

### 330 Protein profiling in CSF reveals differential expression in JE

331 5,070 proteins were identified, including 4,805 human proteins and 265 pathogen proteins, see  
332 supplementary data S4 for MSstatsTMT output for the pilot and larger studies. The pathogen proteins  
333 were bacterial or parasitic proteins. 2244 human proteins were identified in more than half of the  
334 samples included in both the pilot and larger studies. 68 proteins deemed to be contaminants were  
335 removed from the list, see supplementary data S5, resulting in a filtered list of 2176 proteins.

336 268 proteins showed differential expression (167 > 1.2 fold change, FC, and 101 <0.8 FC) based on  
337 the performance of a t test and Benjamini Hochberg multiple testing correction with p value <0.05,  
338 illustrated by the volcano plots in Figure 2.

339

340 Figure 2: Volcano plots of the identified proteins illustrating the statistical significance (t test p  
341 values, a. uncorrected and b. corrected) against the magnitude of change (fold change) for Japanese  
342 encephalitis (JE) vs. Non-JE neurological infections.

343

#### 344 Molecular pathways associated with JE in CSF

345 2176 proteins from 163 patient samples were used to build a weighted gene expression network. A  
346 single outlier was identified, see supplementary data S7, and removed. Further analysis revealed that  
347 this sample had higher overall protein abundances, in spite of peptide normalisation prior to TMT  
348 labelling and downstream normalisation in MSstatsTMT and RobNorm during data processing. 44  
349 modules were identified, and then closely related modules merged into 20 modules, see the tree  
350 diagram illustrating the cluster dendrogram in Figure 3 and the modules in Figures 4. Module-trait  
351 relationships are shown in Figure 5; suggesting that 15 modules were associated with JE (p value <  
352 0.05), 9 upregulated (red) and 6 downregulated (green). 10 of the modules included proteins in the top  
353 five intramodular proteins, that is proteins with the highest modular membership, with significant  
354 differences in abundance between the JE and non-JE group.

355

356 Figure 3: Weighted correlation network analysis cluster dendrogram

357

358 Figure 4: Weighted correlation network analysis clustering of module eigengenes.

359 The red line in the figure indicates the threshold for merging modules together, here the threshold was 0.3.

360



361 Figure 5: Weighted correlation network analysis module-trait relationships.  
362 darkred=anti-apoptosis, red=neuronal damage, sienna3=oxidative stress, orangered4=angiogenesis, yellowgreen=heat shock  
363 response, yellow=unfolded protein response, darkgreen=cellular response to cytokine, floralwhite=translation,  
364 darkolivegreen=acute inflammation, paleturquoise=actin, salmon=extracellular matrix, mediumpurple3=lymphocyte subset,  
365 plum1=hepatotoxicity, darkorange=activation of coagulation, greenyellow=Igs, skyblue3=IgM, brown=cell adhesion and  
366 pathogen attachment, magenta=endothelial activation, pink=macrophages, royalblue=myeloid dendritic cells.

367

## 368 A diagnostic protein signature of JE in CSF

369 Feature selection: In total, 86 proteins were identified by at least one of the feature selection  
370 procedures as important in classifying JE vs non-JE; 68 proteins identified with the Boruta algorithm  
371 and 28 with Lasso, see supplementary data S10. The proteins were associated with 11 different  
372 WGCNA modules, all of which had been identified as associated with JE through WGCNA. 48 were  
373 upregulated and 38 downregulated in comparison to other neurological infections. Functional  
374 enrichment analysis in STRING demonstrated interactions between the proteins, Figure 6. Gene  
375 ontology analysis highlighted overexpression of proteins related to apoptosis and downregulation of  
376 proteins related to neutrophil degranulation, supplementary data S11. 22 proteins were secreted  
377 proteins: Immunoglobulin lambda variable 3-9 (IGLV3-9), Immunoglobulin heavy variable 3-74  
378 (IGHV3-74), Golgi membrane protein 1 (GOLM1), Cathepsin L (CTSL), CEA cell adhesion  
379 molecule 8 (CEACAM8), Phospholipase B domain containing 1 (PLBD1), Cerebellin 1 precursor  
380 (CBLN1), Secreted phosphoprotein 1 (SPP1), Natriuretic peptide C (NPPC), Microtubule associated  
381 protein tau (MAPT), Chitinase 3 like 1 (CHI3L1), ISG15 ubiquitin like modifier (ISG15), Interleukin  
382 18 binding protein (IL18BP), Beta-2-microglobulin (B2M), TNF superfamily member 13b  
383 (TNFSF13B), Bactericidal permeability increasing protein (BPI), Pentraxin 3 (PTX3), Matrix  
384 metalloproteinase 9 (MMP9), S100 calcium binding protein A12 (S100A12), Azurocidin 1 (AZU1),  
385 Olfactomedin 4 (OLFM4) and Matrix metalloproteinase 8 (MMP8). 15 proteins were associated with  
386 increased expression in the brain: Brain abundant membrane attached signal protein 1 (BASP1),  
387 Aldolase, fructose-bisphosphate C (ALDOC), CBLN1, Metallothionein 3 (MTX3), MAP2, Tyrosine  
388 3-monooxygenase/tryptophan 5-monooxygenase activation protein gamma (YWHAG), Tyrosine 3-

389 monoxygenase/tryptophan 5-monoxygenase activation protein eta (YWHAH), MARCKS like 1  
390 (MARCKSL1), Secernin 1 (SCRN1), SPP1, Microtubule associated protein tau (MAPT), CHI3L1,  
391 Paralemmin (PALM), Reticulon 1 (RTN1), Purkinje cell protein 4 (PCP4), Cytidine/uridine  
392 monophosphate kinase 2 (CMPK2), NPPC, Glial fibrillary acidic protein (GFAP), Cell cycle exit and  
393 neuronal differentiation 1 (CEND1). Thus, three proteins were secreted and showed an increased  
394 expression in the brain: SPP1, MAPT, CHIL3, NPPC and CBLN1.

395 JEV has a predilection for the thalamus and substantia nigra of the basal ganglia (23). One of the  
396 proteins were ‘group enriched’ in the thalamus, MMP9, from the HPA database. Four proteins were  
397 associated with the GO term ‘substantia nigra development’, associated with BASP1, Glucose-6-  
398 phosphate dehydrogenase (G6PD), YWHAH and 14-3-3 protein epsilon (14-3-3epsilon). The HPA  
399 database includes mRNA expression data from 13 brain regions, including the basal ganglia and  
400 thalamus; substantia nigra expression on its own is not reported  
401 (<https://www.proteinatlas.org/humanproteome/brain>).

402

403 Figure 6: STRING functional protein association network [https://version-11-5.string-](https://version-11-5.string-db.org/cgi/network?taskId=bMZcY3ZdJua4&sessionId=bpgLGeFd4RM1)  
404 [db.org/cgi/network?taskId=bMZcY3ZdJua4&sessionId=bpgLGeFd4RM1](https://version-11-5.string-db.org/cgi/network?taskId=bMZcY3ZdJua4&sessionId=bpgLGeFd4RM1)

405

406 Predictive modelling:

407 Feature selection identified a final set of 10 proteins which together exhibited high predictive  
408 performance (Figure 7). When examined using the ensemble model, using ten-fold cross validation,  
409 JE classification demonstrated an AUC-ROC of 99.5 (99.2-99.9), in addition to high sensitivity and  
410 specificity – metrics in Table 2 and ROC in supplementary data S12.

411

412 Table 2: Predictive modelling scores with 95% confidence intervals

| Classification task          | Data                              | AUC-ROC          | Accuracy          | Sensitivity      | Specificity       | Positive predictive value | Negative predictive value |
|------------------------------|-----------------------------------|------------------|-------------------|------------------|-------------------|---------------------------|---------------------------|
| JE diagnosis (JE vs. non-JE) | Training set <sup>1</sup> (n=163) | 99.5 (99.2-99.9) | 99.4 (98.8-99.8)  | 99.5 (98.5-99.9) | 99.3 (98.3-99.8)  | 99.3 (98.3-99.8)          | 99.5 (98.5-99.9)          |
|                              | Test set <sup>2</sup> (n=16)      | 91.0% (79.0-100) | 87.5% (61.7-98.5) | 100% (47.8-100)  | 81.8% (48.2-97.7) | 71.4% (29.0-96.3)         | 100% (66.4-100)           |
| JE outcome (dead vs. alive)  | Training set <sup>3</sup> (n=42)  | 88.5 (84.7-92.2) | 86.3 (83.5-88.8)  | 42.0 (32.2-52.3) | 93.7 (91.4, 95.5) | 52.5 (41.0-63.8)          | 90.6 (88.1-92.8)          |

1. The training set included patient samples (68 JE and 95 non-JE confirmed neurological infections) processed by TMT LC-MS/MS. 2. The test set included 10% of the patient samples from the TMT LC-MS/MS analysis processed separately by label-free DIA LC-MS/MS. 3. The training set included all the JE patients included in the TMT LC-MS/MS analysis for which outcome data was available.

413  
414  
415

416

417 Figure 7: Differential expression across samples in ten proteins as a diagnostic signature of Japanese  
418 encephalitis virus infection

419

420 Data acquired by DIA LC-MS/MS of 16 (10%) of the samples was used to verify the ten-protein JE  
421 diagnostic predictive model. The test metrics are reported in Table 2.

422

423 Predictors of JE outcome

424 Feature selection: Subgroup analysis was performed using 42 JE samples for which outcome data at  
425 hospital discharge (died vs. alive) were available. Seven proteins were identified as important in  
426 predicting outcome using the Boruta algorithm and 2 proteins using Lasso, such that 2 proteins were  
427 identified by both Boruta and Lasso, see supplementary data S13. In view of the small sample size,  
428 the data were not split into a training and test set. These proteins were used to train different models  
429 with five-fold CV repeated ten times evaluated on ROC, and then combined in an ensemble model  
430 with cross-validation scores reported in Table 2, see the list of proteins in supplementary data S13 and  
431 ROC in S14. There were five JE patients in the DIA LC-MS analysis of which 3 had outcome data,  
432 and this was considered too small to report test metrics.

## 433 Discussion

434 We performed deep untargeted analysis of well-characterised patient CSF samples from a large  
435 number of different confirmed neurological infections. To our knowledge, the highest number of  
436 proteins in CSF identified to date has been 3,174 (43); thus this research represents a notable  
437 improvement in terms of the numbers of proteins identified and this serves as a marker of the depth of  
438 analysis and prospects for biomarker identification (44). Offline fractionation into 90 fractions in the  
439 pilot study, and 100 fractions concatenated into 44 in the larger study, with two-hour online LC  
440 gradients and multiplexing with TMT-16plex contributed to the depth of analysis. Furthermore, the  
441 diverse range of neurological infections also augmented the variety of proteins identified.

442 WGCNA analysis identified 20 clusters of highly correlated proteins, and provided insight into the  
443 proteins and how they associate with disease mechanisms. The modules were allocated a descriptor,  
444 according to functional enrichment analysis of the proteins. For example, one module was associated  
445 with IgM (proteins in the module included Immunoglobulin heavy constant mu and Immunoglobulin J  
446 chain) and correlated with JE and *Orientia tsutsugamushi* (OT), as well as the duration of illness.  
447 Other important modules associated with upregulation in JE included neuronal damage, anti-  
448 apoptosis, heat shock response, unfolded protein response, cell adhesion, macrophage and dendritic  
449 cell activation. In contrast, in comparison to other non-JE neurological infections, there was an  
450 association with downregulated acute inflammatory response, hepatotoxicity, activation of  
451 coagulation, extracellular matrix and actin regulation.

452 Predictive modelling using the 10 protein ensemble model enabled classification of JE and non-JE  
453 samples with a CV accuracy of 99.4 (95% CI 98.8- 99.8) across all the samples using the TMT  
454 labelled DDA data, and 87.5% (95% CI 61.7-98.5) in verification with 16 (10%) of the samples by  
455 DIA. DIA is a label-free method of analysis, with ongoing improvements in depth and throughput; in  
456 this case providing a complementary method to verify the TMT data rather than performing  
457 traditional targeted LC-MS/MS proteomics such as parallel reaction monitoring (PRM). Three  
458 proteins selected as the best disease classifiers were not “significant” i.e. p value < 0.05 with t-test and  
459 adjustment for multiple testing, highlighting the limitations of univariate analysis in biomarker

460 identification (45). Biomarker discovery is a lengthy process, akin to the pharmaceutical pipeline (13).  
461 The work demonstrates important CSF proteins in classifying JE vs. non-JE. However, there is no  
462 doubt that the protein signature needs to be validated with orthogonal antibody-based methods in  
463 additional patient groups. It will also be useful to compare this with protein profiling in other body  
464 fluids. This will inform the use of a smaller subset of proteins in an ELISA or rapid diagnostic test  
465 (RDT) to be tested alongside the existing anti-JEV IgM assay.

466 To date, to our knowledge, two studies have utilized unbiased techniques to examine the CSF  
467 proteome in human patients with confirmed JEV infection; while they demonstrates the feasibility of  
468 the methods, the patients were not confirmed by seroneutralisation and included relatively small  
469 numbers of patients (10 and 26 JE patients) (46, 47). There have been a handful of studies utilizing  
470 ELISA methods to target specific proteins, however these rarely used power calculations in their  
471 experimental design, nor did they include adequate controls (48-53). Analysis of the transcriptome  
472 and proteome in animal models (54-58) and cell culture (48, 54, 59-64) have been performed,  
473 however the comparability to human CSF and comparison with other neurological infections is  
474 limited. Furthermore, mRNA expression does not directly correlate with that of the corresponding  
475 protein (65).

476 As expected, while we included JEV proteins in the search database, we did not identify any JEV  
477 pathogen proteins. This is compatible with previous publications; non-structural protein 1 is the major  
478 secreted protein during flavivirus infections, harnessed widely as a diagnostic biomarker for Dengue  
479 virus infection, but not a useful diagnostic biomarker for JE (66). The data provide useful  
480 interrogation of the host response to JEV infection. The identified proteins fit well into the existing  
481 literature on the host response in JEV and other closely-associated flavivirus infections, most  
482 importantly West Nile virus infection (67, 68). MAPT and MAP2 are both closely associated  
483 microtubule stabilising proteins specific to neuronal cells (69). Both proteins were identified in this  
484 study as being biomarkers of JE in CSF, and the high levels in comparison to other neurological  
485 infections is striking. The association of the former has previously been demonstrated by ELISA, in  
486 one of the only studies of this type (70). The role of actin, microtubule and intermediate filament

487 cytoskeletal re-organisation in flavivirus infection has been described (71) and upregulation of MAPT  
488 and MAP2 may represent neuronal damage following transneuronal spread of JEV. Other proteins that  
489 were associated with JE in this study, all within the red WGCNA module, that may reflect neuronal  
490 damage include Paralemmin, Calbindin 1, MAP2, Parvalbumin, Secernin 1 and Cell cycle exit and  
491 neuronal differentiation. The upregulation of ISG15 and ISG20 fit in with the known upregulation of  
492 a host of ISGs as part of the innate immune response to a viral infection (72, 73). Additional  
493 functional enrichments reflecting different WGCNA modules have previously been described anti-  
494 apoptosis (74), heat shock response (75, 76), unfolded protein response (77), translation (78), IgM  
495 (79), cell adhesion and pathogen attachment (80), endothelial activation (81) and macrophage  
496 activation (82, 83). In comparison to other neurological infections, there was a downregulation in  
497 acute phase response proteins and neutrophil enriched proteins, as has been seen by other studies (84-  
498 87). In these, however, the sample size for the analysis of proteins predictive of outcome was less  
499 substantial and not supported by an a priori power calculation.

500 Incomplete coverage and missing data between LC-MS runs is an ongoing issue in the field (29). It is  
501 notable that comparing with other similar studies in the literature, the important proteins may not be  
502 exactly the same but are closely related. These issues are now being improved by DIA methods.  
503 Further limitations are that we did not include CSF from healthy people in Laos on ethical grounds, or  
504 from cohorts from elsewhere on the basis that samples that have undergone different storage  
505 conditions may not be comparable. The latter is also the reason that there are no samples from  
506 neurological flaviviruses occurring in other geographical areas, such as West Nile virus (WNV) and  
507 Zika virus (ZIKV). Furthermore, for the purposes of the objective of finding a diagnostic protein  
508 signature of JE, the utmost importance was comparing JE with controls of a wide range of other  
509 neurological infections. The analysis of proteins predictive of different categories of infectious  
510 aetiologies was not sufficiently powered, and has not been reported. It is important to keep in mind  
511 that the comparison is between different neurological infections in the analysis of proteins that are up  
512 and down-regulated.

513 An RDT to detect JE in less accessible areas is urgently needed. This study demonstrates the  
514 feasibility of an unbiased LC-MS approach in the identification of novel protein biomarkers of  
515 neurological infections. Additional data using antibody-based methods will allow the 10-protein  
516 signature to be refined. This will require purchasing or development of ELISA assays and comparing  
517 the specific protein abundance in JE and non-JE patients. These data will need to be validated in a  
518 larger group of patients, in different locations and in field settings. Ultimately, this will enable the  
519 selection of 2-3 proteins for the development of an RDT.

## 520 Author contributions

521 TB, BG, NZ, ADP and PNN conceived the study. The Laos CNS study was completed by ADP, PNN,  
522 XDL, MV, MM, SP, AC, OS, OP and the SEAE collaborators. JEV seroneutralisation was performed  
523 in Marseille by TB, NA, BP and supervised by ADP and XDL. TB, BG and NZ developed the  
524 methodology for the TMT LC-MS/MS analysis, and TB performed the laboratory work with input  
525 from AK, BG and DO. IV, RF and BK developed the methodology for the DIA LC-MS/MS analysis,  
526 and TB and IV performed the laboratory work. TB performed the data analysis with input from AM.  
527 TB wrote the manuscript; all the authors edited successive drafts and approved the final version.

528

## 529 Acknowledgements

530 We are very grateful to the patients and to Bounthaphany Bounxouei, the former Director of Mahosot  
531 Hospital, the late Rattanaphone Phetsouvanh, Director of the Microbiology Laboratory, and the staff  
532 of the wards and Microbiology Laboratory of Mahosot Hospital. We also thank Bounnak  
533 Saysanasongkham, the former Director of the Department of Healthcare and Rehabilitation, Ministry  
534 of Health, and Bounkong Syhavong, Minister of Health, Lao PDR for their very kind help and  
535 support. We thank the stakeholders of the SEAE project, members of the Unité des Virus Émergents  
536 (Christine Isnard and Camille Placidi) and the CNR des Arbovirus (Patrick Gravier, Gilda Grard,  
537 Isabelle Leparç-Goffart and Mathilde Galla). Finally, we acknowledge useful discussions on the data  
538 analysis with Andrew R. Jones at the University of Liverpool, and Damien Ming, Mauricio Barahona  
539 and Robert Peach at Imperial College London.

540

## 541 South-East Asia Encephalitis (SEAE) Study (SEAE) Collaborators

542 We are grateful to all the SEAE study researchers, including Philippe Buchy, Em Bunnakea, Julien  
543 Cappelle, Mey Channa, Veronique Chevalier, Yoann Crabol, Philippe Dussart, Marc Eloit,  
544 Christopher Gorma, Magali Herrant, Nguyen Hien, Chaw Su Hlaing, Jérôme Honnorat, Tran Thi Mai



545 Hung, Tran Thi Thu Huong, Latt Latt Kyaw, Nguyen Van Lam, Denis Laurent, Marc Lecuit, Kyaw  
546 Linn, Olivier Lortholary, Aye Mya Min Aye, Philippe Perot, Sommanikhone Phangmanixay,  
547 Khounthavy Phongsavath, Phan Huu Phuc, Anne-Laurie Pinto, Patrice Piola, Jean-David Pommier,  
548 Bruno Rosset, Ky Santy, Heng Sothy, Arnaud Tarantola, Nguyen Thi Thu Thuy, Htay Htay Tin,  
549 Ommar Swe Tin, Pham Nhat An, Dang Duc Anh, Pascal Bonnet, Kimrong Bun, Danoy Chommanam,  
550 Viengmon Davong, Patrice Debré, Jean-François Delfraissy, Christian Devaux, Anousone  
551 Douangnouvong, Veasna Duong, Benoit Durand, Chanreaksmey Eng, Catherine Ferrant, Didier  
552 Fontenille, Lukas Hafner, Le Thanh Hai, Do Thu Huong, Marc Jouan, May July, Magali Lago, Jean-  
553 Paul Moatti, Bernadette Murgue, Khin Yi Oo, MengHeng Oum, Khansoudaphone Phakhounthong,  
554 Anh Tuan Pham, Do Quyen, Malee Seephonelee, Maud Seguy, Bountoy Sibounheunang, Kanarith  
555 Sim, Luong Minh Tan, Cho Thair, Win Thein, Phung Bich Thuy, Hervé Tissot-Dupont and Malavanh  
556 Vongsouvath.

557

## 558 Funding

559 TB was supported by the University of Oxford and the Medical Research Council (grant  
560 MR/N013468/1). The work was also supported by the Oxford Glycobiology endowment, the Institute  
561 of Research for Development, Aix-Marseille University and the European Union's Horizon 2020  
562 research, Fondation Total, Institut Pasteur, International Network Institut Pasteur, Fondation Merieux,  
563 Aviesan Sud, Institut national de la santé et de la recherche médicale (Inserm), and innovation  
564 programme EVAg (grant agreement 653316). This research was funded in part by the Wellcome  
565 Trust. For the purpose of Open Access, the author has applied a CC BY public copyright licence to  
566 any Author Accepted Manuscript version arising from this submission. AM was supported by a  
567 scholarship from the Medical Research Foundation National PhD Training Programme in  
568 Antimicrobial Resistance Research (MRF-145-0004-TPG-AVISO). DPO, IV, RF and BK are  
569 supported by the CAMS China Oxford Institute. LT is a Wellcome clinical career development  
570 fellow, supported by grant number 205228/Z/16/Z, and the NIHR Health Protection Research Unit in

571 emerging and zoonotic infections (NIHR200907) at University of Liverpool in partnership with  
572 Public Health England (PHE), in collaboration with Liverpool School of Tropical Medicine and the  
573 University of Oxford.

574

## 575 Competing interests

576 None declared.

577

## 578 Ethical approval

579 Ethical clearance for the Laos CNS study was granted by the Ethical Review Committee of the former  
580 Faculty of Medical Sciences, National University of Laos (now University of Health Sciences) and  
581 the Oxford University Tropical Ethics Research Committee, Oxford, UK.

582

## 583 Data availability

584 The mass spectrometry proteomics data sets were submitted to the PRIDE public data repository. All  
585 other data underlying this article are available in the article and in its online supplementary material.

586

## 587 References

- 588 1. Moore SM. The current burden of Japanese encephalitis and the estimated impacts of  
589 vaccination: Combining estimates of the spatial distribution and transmission intensity of a zoonotic  
590 pathogen. *PLoS neglected tropical diseases*. 2021;15(10):e0009385-e.  
591 2. Mulvey P, Duong V, Boyer S, Burgess G, Williams DT, Dussart P, et al. The Ecology and  
592 Evolution of Japanese Encephalitis Virus. *Pathogens (Basel, Switzerland)*. 2021;10(12).  
593 3. Health AGDo. Japanese encephalitis virus 2022 [Available from:  
594 <https://www.health.gov.au/health-alerts/japanese-encephalitis-virus-jev/about>.  
595 4. Mayxay M, Douangdala P, Vilayhong C, Phommason K, Chansamouth V, Vongsouvath M,  
596 et al. Outcome of Japanese Encephalitis Virus (JEV) Infection in Pediatric and Adult Patients at

- 597 Mahosot Hospital, Vientiane, Lao PDR. *The American journal of tropical medicine and hygiene*.  
598 2020;104(2):567-75.
- 599 5. Turtle L, Solomon T. Japanese encephalitis - the prospects for new treatments. *Nat Rev*  
600 *Neurol*. 2018;14(5):298-313.
- 601 6. Vannice KS, Hills SL, Schwartz LM, Barrett AD, Heffelfinger J, Hombach J, et al. The future  
602 of Japanese encephalitis vaccination: expert recommendations for achieving and maintaining optimal  
603 JE control. *NPJ vaccines*. 2021;6(1):82.
- 604 7. Heffelfinger JD, Li X, Batmunkh N, Grabovac V, Diorditsa S, Liyanage JB, et al. Japanese  
605 Encephalitis Surveillance and Immunization - Asia and Western Pacific Regions, 2016. *MMWR*  
606 *Morb Mortal Wkly Rep*. 2017;66(22):579-83.
- 607 8. Bharucha T, Shearer FM, Vongsouvath M, Mayxay M, de Lamballerie X, Newton PN, et al.  
608 A need to raise the bar - A systematic review of temporal trends in diagnostics for Japanese  
609 encephalitis virus infection, and perspectives for future research. *Int J Infect Dis*. 2020.
- 610 9. Robinson JS, Featherstone D, Vasanthapuram R, Biggerstaff BJ, Desai A, Ramamurty N, et  
611 al. Evaluation of three commercially available Japanese encephalitis virus IgM enzyme-linked  
612 immunosorbent assays. *The American journal of tropical medicine and hygiene*. 2010;83(5):1146-55.
- 613 10. Dubot-Peres A, Sengvilaipaseuth O, Chanthongthip A, Newton PN, de Lamballerie X. How  
614 many patients with anti-JEV IgM in cerebrospinal fluid really have Japanese encephalitis? *The Lancet*  
615 *Infectious diseases*. 2015;15(12):1376-7.
- 616 11. Hills S, Van Keulen A, Feser J, Panella A, Letson B, Staples E, et al. Persistence of IgM  
617 Antibodies after Vaccination with Live Attenuated Japanese Encephalitis Vaccine. *The American*  
618 *journal of tropical medicine and hygiene*. 2020;104(2):576-9.
- 619 12. Bharucha T, Sengvilaipaseuth O, Vongsouvath M, Vongsouvath M, Davong V,  
620 Panyanouvong P, et al. Development of an improved RT-qPCR Assay for detection of Japanese  
621 encephalitis virus (JEV) RNA including a systematic review and comprehensive comparison with  
622 published methods. *PloS one*. 2018;13(3):e0194412.
- 623 13. Bharucha T, Gangadharan B, Kumar A, de Lamballerie X, Newton PN, Winterberg M, et al.  
624 Mass spectrometry-based proteomic techniques to identify cerebrospinal fluid biomarkers for  
625 diagnosing suspected central nervous system infections. A systematic review. *J Infect*.  
626 2019;79(5):407-18.
- 627 14. Dayon L, Cominetti O, Affolter M. Proteomics of human biological fluids for biomarker  
628 discoveries: technical advances and recent applications. *Expert review of proteomics*. 2022:1-21.
- 629 15. Newman M. *Networks*: Oxford university press; 2018.
- 630 16. Hastie T, Tibshirani R, Friedman JH, Friedman JH. *The elements of statistical learning: data*  
631 *mining, inference, and prediction*: Springer; 2009.
- 632 17. Barabási A-L. *Network science*. *Philosophical Transactions of the Royal Society A:*  
633 *Mathematical, Physical and Engineering Sciences*. 2013;371(1987):20120375.
- 634 18. Barabási A-L, Gulbahce N, Loscalzo J. *Network medicine: a network-based approach to*  
635 *human disease*. *Nature reviews genetics*. 2011;12(1):56-68.
- 636 19. Mann M, Kumar C, Zeng WF, Strauss MT. Artificial intelligence for proteomics and  
637 biomarker discovery. *Cell systems*. 2021;12(8):759-70.
- 638 20. Myall AC, Perkins S, Rushton D, David J, Spencer P, Jones AR, et al. An OMICs-based  
639 meta-analysis to support infection state stratification. *Bioinformatics (Oxford, England)*.  
640 2021;37(16):2347-55.
- 641 21. Dubot-Peres A, Mayxay M, Phetsouvanh R, Lee SJ, Rattanavong S, Vongsouvath M, et al.  
642 Management of Central Nervous System Infections, Vientiane, Laos, 2003-2011. *Emerging Infectious*  
643 *Diseases*. 2019;25(5):898-910.
- 644 22. Pommier JD, Gorman C, Crabol Y, Bleakley K, Sothy H, Santy K, et al. Childhood  
645 encephalitis in the Greater Mekong region (the SouthEast Asia Encephalitis Project): a multicentre  
646 prospective study. *The Lancet Global Health*. 2022;10(7):e989-e1002.
- 647 23. Bharucha T, Ayhan N, Pastorino B, Rattanavong S, Vongsouvath M, Mayxay M, et al.  
648 Immunoglobulin M seroneutralization for improved confirmation of Japanese encephalitis virus  
649 infection in a flavivirus-endemic area. *Trans R Soc Trop Med Hyg*. 2022.

- 650 24. Muntel J, Kirkpatrick J, Bruderer R, Huang T, Vitek O, Ori A, et al. Comparison of Protein  
651 Quantification in a Complex Background by DIA and TMT Workflows with Fixed Instrument Time.  
652 *Journal of proteome research*. 2019;18(3):1340-51.
- 653 25. Pounds S. 2 FDRsampsizemethod. Compute Sample Size that Meets Requirements for  
654 Average Power. 2016;2.
- 655 26. Eng JK, McCormack AL, Yates JR. An approach to correlate tandem mass spectral data of  
656 peptides with amino acid sequences in a protein database. *Journal of the American Society for Mass  
657 Spectrometry*. 1994;5(11):976-89.
- 658 27. Käll L, Canterbury JD, Weston J, Noble WS, MacCoss MJ. Semi-supervised learning for  
659 peptide identification from shotgun proteomics datasets. *Nature Methods*. 2007;4:923.
- 660 28. Huang T, Choi M, Tzouros M, Golling S, Pandya NJ, Banfai B, et al. MSstatsTMT:  
661 Statistical Detection of Differentially Abundant Proteins in Experiments with Isobaric Labeling and  
662 Multiple Mixtures. *Mol Cell Proteomics*. 2020;19(10):1706-23.
- 663 29. Ma W, Kim S, Chowdhury S, Li Z, Yang M, Yoo S, et al. DreamAI: algorithm for the  
664 imputation of proteomics data. *bioRxiv*. 2021:2020.07.21.214205.
- 665 30. Wang M, Jiang L, Jian R, Chan JY, Liu Q, Snyder MP, et al. RobNorm: model-based robust  
666 normalization method for labeled quantitative mass spectrometry proteomics data. *Bioinformatics  
667 (Oxford, England)*. 2021;37(6):815-21.
- 668 31. Johnson WE, Li C, Rabinovic A. Adjusting batch effects in microarray expression data using  
669 empirical Bayes methods. *Biostatistics (Oxford, England)*. 2007;8(1):118-27.
- 670 32. Leek JT, Johnson WE, Parker HS, Fertig EJ, Jaffe AE, Storey JD, et al. sva: Surrogate  
671 variable analysis. R package version. 2021;3(0):882-3.
- 672 33. Langfelder P, Horvath S. WGCNA: an R package for weighted correlation network analysis.  
673 *BMC Bioinformatics*. 2008;9:559.
- 674 34. Kursa MB, Rudnicki WR. Feature selection with the Boruta package. *Journal of statistical  
675 software*. 2010;36:1-13.
- 676 35. Friedman J, Hastie T, Tibshirani R, Narasimhan B, Tay K, Simon N, et al. Package ‘glmnet’.  
677 *Journal of Statistical Software* 2010a. 2021;33(1).
- 678 36. Wen P, Dayyani F, Tao R, Zhong X. Screening and verification of potential gene targets in  
679 esophageal carcinoma by bioinformatics analysis and immunohistochemistry. *Ann Transl Med*.  
680 2022;10(2):70.
- 681 37. Kuhn M, Wing J, Weston S, Williams A, Keefer C, Engelhardt A, et al. Package ‘caret’. *The  
682 R Journal*. 2020;223:7.
- 683 38. Szklarczyk D, Gable AL, Lyon D, Junge A, Wyder S, Huerta-Cepas J, et al. STRING v11:  
684 protein-protein association networks with increased coverage, supporting functional discovery in  
685 genome-wide experimental datasets. *Nucleic acids research*. 2019;47(D1):D607-D13.
- 686 39. Mi H, Huang X, Muruganujan A, Tang H, Mills C, Kang D, et al. PANTHER version 11:  
687 expanded annotation data from Gene Ontology and Reactome pathways, and data analysis tool  
688 enhancements. *Nucleic Acids Research*. 2016;45(D1):D183-D9.
- 689 40. Petryszak R, Burdett T, Fiorelli B, Fonseca NA, Gonzalez-Porta M, Hastings E, et al.  
690 Expression Atlas update--a database of gene and transcript expression from microarray- and  
691 sequencing-based functional genomics experiments. *Nucleic acids research*. 2014;42(Database  
692 issue):D926-D32.
- 693 41. Uhlén M, Fagerberg L, Hallström BM, Lindskog C, Oksvold P, Mardinoglu A, et al. Tissue-  
694 based map of the human proteome. *Science*. 2015;347(6220):1260419.
- 695 42. Demichev V, Messner CB, Vernardis SI, Lilley KS, Ralser M. DIA-NN: neural networks and  
696 interference correction enable deep proteome coverage in high throughput. *Nat Methods*.  
697 2020;17(1):41-4.
- 698 43. Macron C, Lavigne R, Núñez Galindo A, Affolter M, Pineau C, Dayon L. Exploration of  
699 human cerebrospinal fluid: A large proteome dataset revealed by trapped ion mobility time-of-flight  
700 mass spectrometry. *Data in brief*. 2020;31:105704-.
- 701 44. Geyer PE, Holdt LM, Teupser D, Mann M. Revisiting biomarker discovery by  
702 plasma proteomics. *Molecular systems biology*. 2017;13(9):942-.
- 703 45. Halder A, Verma A, Biswas D, Srivastava S. Recent advances in mass-spectrometry based  
704 proteomics software, tools and databases. *Drug discovery today Technologies*. 2021;39:69-79.

- 705 46. Sengupta N, Mukherjee S, Tripathi P, Kumar R, Suryavanshi A, Basu A. Cerebrospinal Fluid  
706 Biomarkers of Japanese Encephalitis. *F1000Research*. 2015;4:334.
- 707 47. Yin R, Yang L, Hao Y, Yang Z, Lu T, Jin W, et al. Proteomic landscape subtype and clinical  
708 prognosis of patients with the cognitive impairment by Japanese encephalitis infection. *Journal of*  
709 *Neuroinflammation*. 2022;19(1):77.
- 710 48. Baluni M, Ghildiyal S, Fatima T, Tiwari R, Upadhyay S, Dhole TN, et al. Differential  
711 expression of circulating microRNAs in serum: Potential biomarkers to track Japanese encephalitis  
712 virus infection. *J Med Virol*. 2022;94(2):531-9.
- 713 49. Deval H, Alagarasu K, Srivastava N, Bachal R, Mittal M, Agrawal A, et al. Association of  
714 single nucleotide polymorphisms in the CD209, MMP9, TNFA and IFNG genes with susceptibility to  
715 Japanese encephalitis in children from North India. *Gene*. 2022;808:145962.
- 716 50. Shukla V, Shakya AK, Dhole TN, Misra UK. Matrix metalloproteinases and their tissue  
717 inhibitors in serum and cerebrospinal fluid of children with Japanese encephalitis virus infection.  
718 *Arch Virol*. 2013;158(12):2561-75.
- 719 51. Singh A, Kulshreshtha R, Mathur A. Secretion of the chemokine interleukin-8 during  
720 Japanese encephalitis virus infection. *J Med Microbiol*. 2000;49(7):607-12.
- 721 52. Son H, Sunwoo JS, Lee SK, Chu K, Lee ST. Clinical Outcomes of Japanese Encephalitis after  
722 Combination Treatment of Immunoglobulin, Ribavirin, and Interferon- $\alpha$ 2b. *Journal of clinical*  
723 *neurology (Seoul, Korea)*. 2021;17(3):428-34.
- 724 53. Tiwari R, Ghildiyal S, Baluni M, Singh D, Srivastava JK, Kumar R, et al. Association of  
725 interleukin-6 (174 G/C) and interleukin-12B (1188 A/C) gene polymorphism with expression and risk  
726 of Japanese encephalitis disease in North Indian population. *J Neuroimmunol*. 2021;358:577630.
- 727 54. Bhaskar M, Mukherjee S, Basu A. Involvement of RIG-I Pathway in Neurotropic Virus-  
728 Induced Acute Flaccid Paralysis and Subsequent Spinal Motor Neuron Death. *mBio*.  
729 2021;12(6):e0271221.
- 730 55. Jhan MK, Chen CL, Shen TJ, Tseng PC, Wang YT, Satria RD, et al. Polarization of Type 1  
731 Macrophages Is Associated with the Severity of Viral Encephalitis Caused by Japanese Encephalitis  
732 Virus and Dengue Virus. *Cells*. 2021;10(11).
- 733 56. Li Q, Zhou D, Jia F, Zhang L, Ashraf U, Li Y, et al. Japanese Encephalitis Virus NS1' Protein  
734 Interacts with Host CDK1 Protein to Regulate Antiviral Response. *Microbiol Spectr*.  
735 2021;9(3):e0166121.
- 736 57. Swarup V, Ghosh J, Duseja R, Ghosh S, Basu A. Japanese encephalitis virus infection  
737 decrease endogenous IL-10 production: correlation with microglial activation and neuronal death.  
738 *Neurosci Lett*. 2007;420(2):144-9.
- 739 58. Tripathi A, Banerjee A, Vrati S. Development and characterization of an animal model of  
740 Japanese encephalitis virus infection in adolescent C57BL/6 mouse. *Disease models & mechanisms*.  
741 2021;14(10).
- 742 59. Li M, Yang J, Ye C, Bian P, Yang X, Zhang H, et al. Integrated Metabolomics and  
743 Transcriptomics Analyses Reveal Metabolic Landscape in Neuronal Cells during JEV Infection. *Virology*  
744 *Sin*. 2021;36(6):1554-65.
- 745 60. Liu H, Zhang J, Niu Y, Liang G. The 5' and 3' Untranslated Regions of the Japanese  
746 Encephalitis Virus (JEV): Molecular Genetics and Higher Order Structures. *Front Microbiol*.  
747 2021;12:730045.
- 748 61. Sharma KB, Chhabra S, Aggarwal S, Tripathi A, Banerjee A, Yadav AK, et al. Proteomic  
749 landscape of Japanese encephalitis virus-infected fibroblasts. *J Gen Virol*. 2021;102(9).
- 750 62. Wang P, Liu X, Li Q, Wang J, Ruan W. Proteomic analyses identify intracellular targets for  
751 Japanese encephalitis virus nonstructural protein 1 (NS1). *Virus Res*. 2021;302:198495.
- 752 63. Xu P, Tong W, Chen YM. FUSE binding protein FUBP3 is a potent regulator in Japanese  
753 encephalitis virus infection. *Virology*. 2021;18(1):224.
- 754 64. Yang J, Li M, Yuan M, Bian P, Dong Y, Zhang H, et al. Axl(-/-) neurons promote JEV  
755 infection by dampening the innate immunity. *Virus Res*. 2022;307:198605.
- 756 65. Kosti I, Jain N, Aran D, Butte AJ, Sirota M. Cross-tissue Analysis of Gene and Protein  
757 Expression in Normal and Cancer Tissues. *Scientific reports*. 2016;6:24799.

- 758 66. Li YZ, Counor D, Lu P, Liang GD, Vu TQ, Phan TN, et al. A specific and sensitive antigen  
759 capture assay for NS1 protein quantitation in Japanese encephalitis virus infection. *J Virol Methods*.  
760 2012;179(1):8-16.
- 761 67. Fraiser C, Papa A, Granjeaud S, Hintzen R, Martina B, Camoin L, et al. Cerebrospinal fluid  
762 biomarker candidates associated with human WNV neuroinvasive disease. *PloS one*.  
763 2014;9(4):e93637.
- 764 68. Ashraf U, Ding Z, Deng S, Ye J, Cao S, Chen Z. Pathogenicity and virulence of Japanese  
765 encephalitis virus: Neuroinflammation and neuronal cell damage. *Virulence*. 2021;12(1):968-80.
- 766 69. Hohmann T, Dehghani F. The Cytoskeleton-A Complex Interacting Meshwork. *Cells*.  
767 2019;8(4):362.
- 768 70. Dittrich S, Sunyakumthorn P, Rattanavong S, Phetsouvanh R, Panyanivong P,  
769 Sengduangphachanh A, et al. Blood-Brain Barrier Function and Biomarkers of Central Nervous  
770 System Injury in Rickettsial Versus Other Neurological Infections in Laos. *The American journal of*  
771 *tropical medicine and hygiene*. 2015;93(2):232-7.
- 772 71. Foo KY, Chee H-Y. Interaction between Flavivirus and Cytoskeleton during Virus  
773 Replication. *BioMed research international*. 2015;2015:427814-.
- 774 72. Schoggins JW. Interferon-Stimulated Genes: What Do They All Do? *Annual review of*  
775 *virology*. 2019;6(1):567-84.
- 776 73. Nair S, Diamond MS. Innate immune interactions within the central nervous system modulate  
777 pathogenesis of viral infections. *Current opinion in immunology*. 2015;36:47-53.
- 778 74. Pan Y, Cheng A, Wang M, Yin Z, Jia R. The Dual Regulation of Apoptosis by Flavivirus.  
779 *Front Microbiol*. 2021;12:654494.
- 780 75. Roby JA, Esser-Nobis K, Dewey-Verstelle EC, Fairgrieve MR, Schwerk J, Lu AY, et al.  
781 Flavivirus Nonstructural Protein NS5 Dysregulates HSP90 to Broadly Inhibit JAK/STAT Signaling.  
782 *Cells*. 2020;9(4).
- 783 76. Wang Y, Li Y, Ding T. Heat shock protein 90 $\beta$  in the Vero cell membrane binds Japanese  
784 encephalitis virus. *Int J Mol Med*. 2017;40(2):474-82.
- 785 77. Lewy TG, Grabowski JM, Bloom ME. BiP: Master Regulator of the Unfolded Protein  
786 Response and Crucial Factor in Flavivirus Biology *The Yale journal of biology and medicine*.  
787 2017;90(2):291-300.
- 788 78. Chhajer H, Rizvi VA, Roy R. Life cycle process dependencies of positive-sense RNA viruses  
789 suggest strategies for inhibiting productive cellular infection. *Journal of the Royal Society, Interface*.  
790 2021;18(184):20210401.
- 791 79. Burke DS, Nisalak A, Ussery MA, Laorakpongse T, Chantavibul S. Kinetics of IgM and IgG  
792 Responses to Japanese Encephalitis Virus in Human Serum and Cerebrospinal Fluid. *J Infect Dis*.  
793 1985;151 1093-9.
- 794 80. Sooryanarain H, Ayachit V, Gore M. Activated CD56(+) lymphocytes (NK+NKT) mediate  
795 immunomodulatory and anti-viral effects during Japanese encephalitis virus infection of dendritic  
796 cells in-vitro. *Virology*. 2012;432(2):250-60.
- 797 81. Myint KS, Kipar A, Jarman RG, Gibbons RV, Perng GC, Flanagan B, et al.  
798 Neuropathogenesis of Japanese encephalitis in a primate model. *PLoS neglected tropical diseases*.  
799 2014;8(8):e2980.
- 800 82. Kumar A, Kalita J, Sinha RA, Singh G, B A, Shukla M, et al. Impaired Autophagy Flux is  
801 Associated with Proinflammatory Microglia Activation Following Japanese Encephalitis Virus  
802 Infection. *Neurochem Res*. 2020;45(9):2184-95.
- 803 83. Wang ZY, Zhen ZD, Fan DY, Wang PG, An J. Transcriptomic Analysis Suggests the M1  
804 Polarization and Launch of Diverse Programmed Cell Death Pathways in Japanese Encephalitis  
805 Virus-Infected Macrophages. *Viruses*. 2020;12(3).
- 806 84. Bakochi A, Mohanty T, Pyl PT, Gueto-Tettay CA, Malmström L, Linder A, et al.  
807 Cerebrospinal fluid proteome maps detect pathogen-specific host response patterns in meningitis.  
808 *eLife*. 2021;10:e64159.
- 809 85. Bakochi A, Mohanty T, Pyl PT, Gueto-Tettay CA, Malmström L, Linder A, et al.  
810 Cerebrospinal fluid proteome maps detect pathogen-specific host response patterns in meningitis.  
811 *eLife*. 2021;10.

- 812 86. Zatta M, Di Bella S, Bottazzi B, Rossi F, D'Agaro P, Segat L, et al. Determination of  
813 pentraxin 3 levels in cerebrospinal fluid during central nervous system infections. *Eur J Clin*  
814 *Microbiol Infect Dis.* 2020;39(4):665-70.
- 815 87. Behairy Bel S, Salama EI, Allam AA, Ali MA, Elaziz AM. Lipocalin-2 as a marker of  
816 bacterial infections in chronic liver disease: a study in Egyptian children. *Egypt J Immunol.*  
817 2011;18(2):31-6.

818

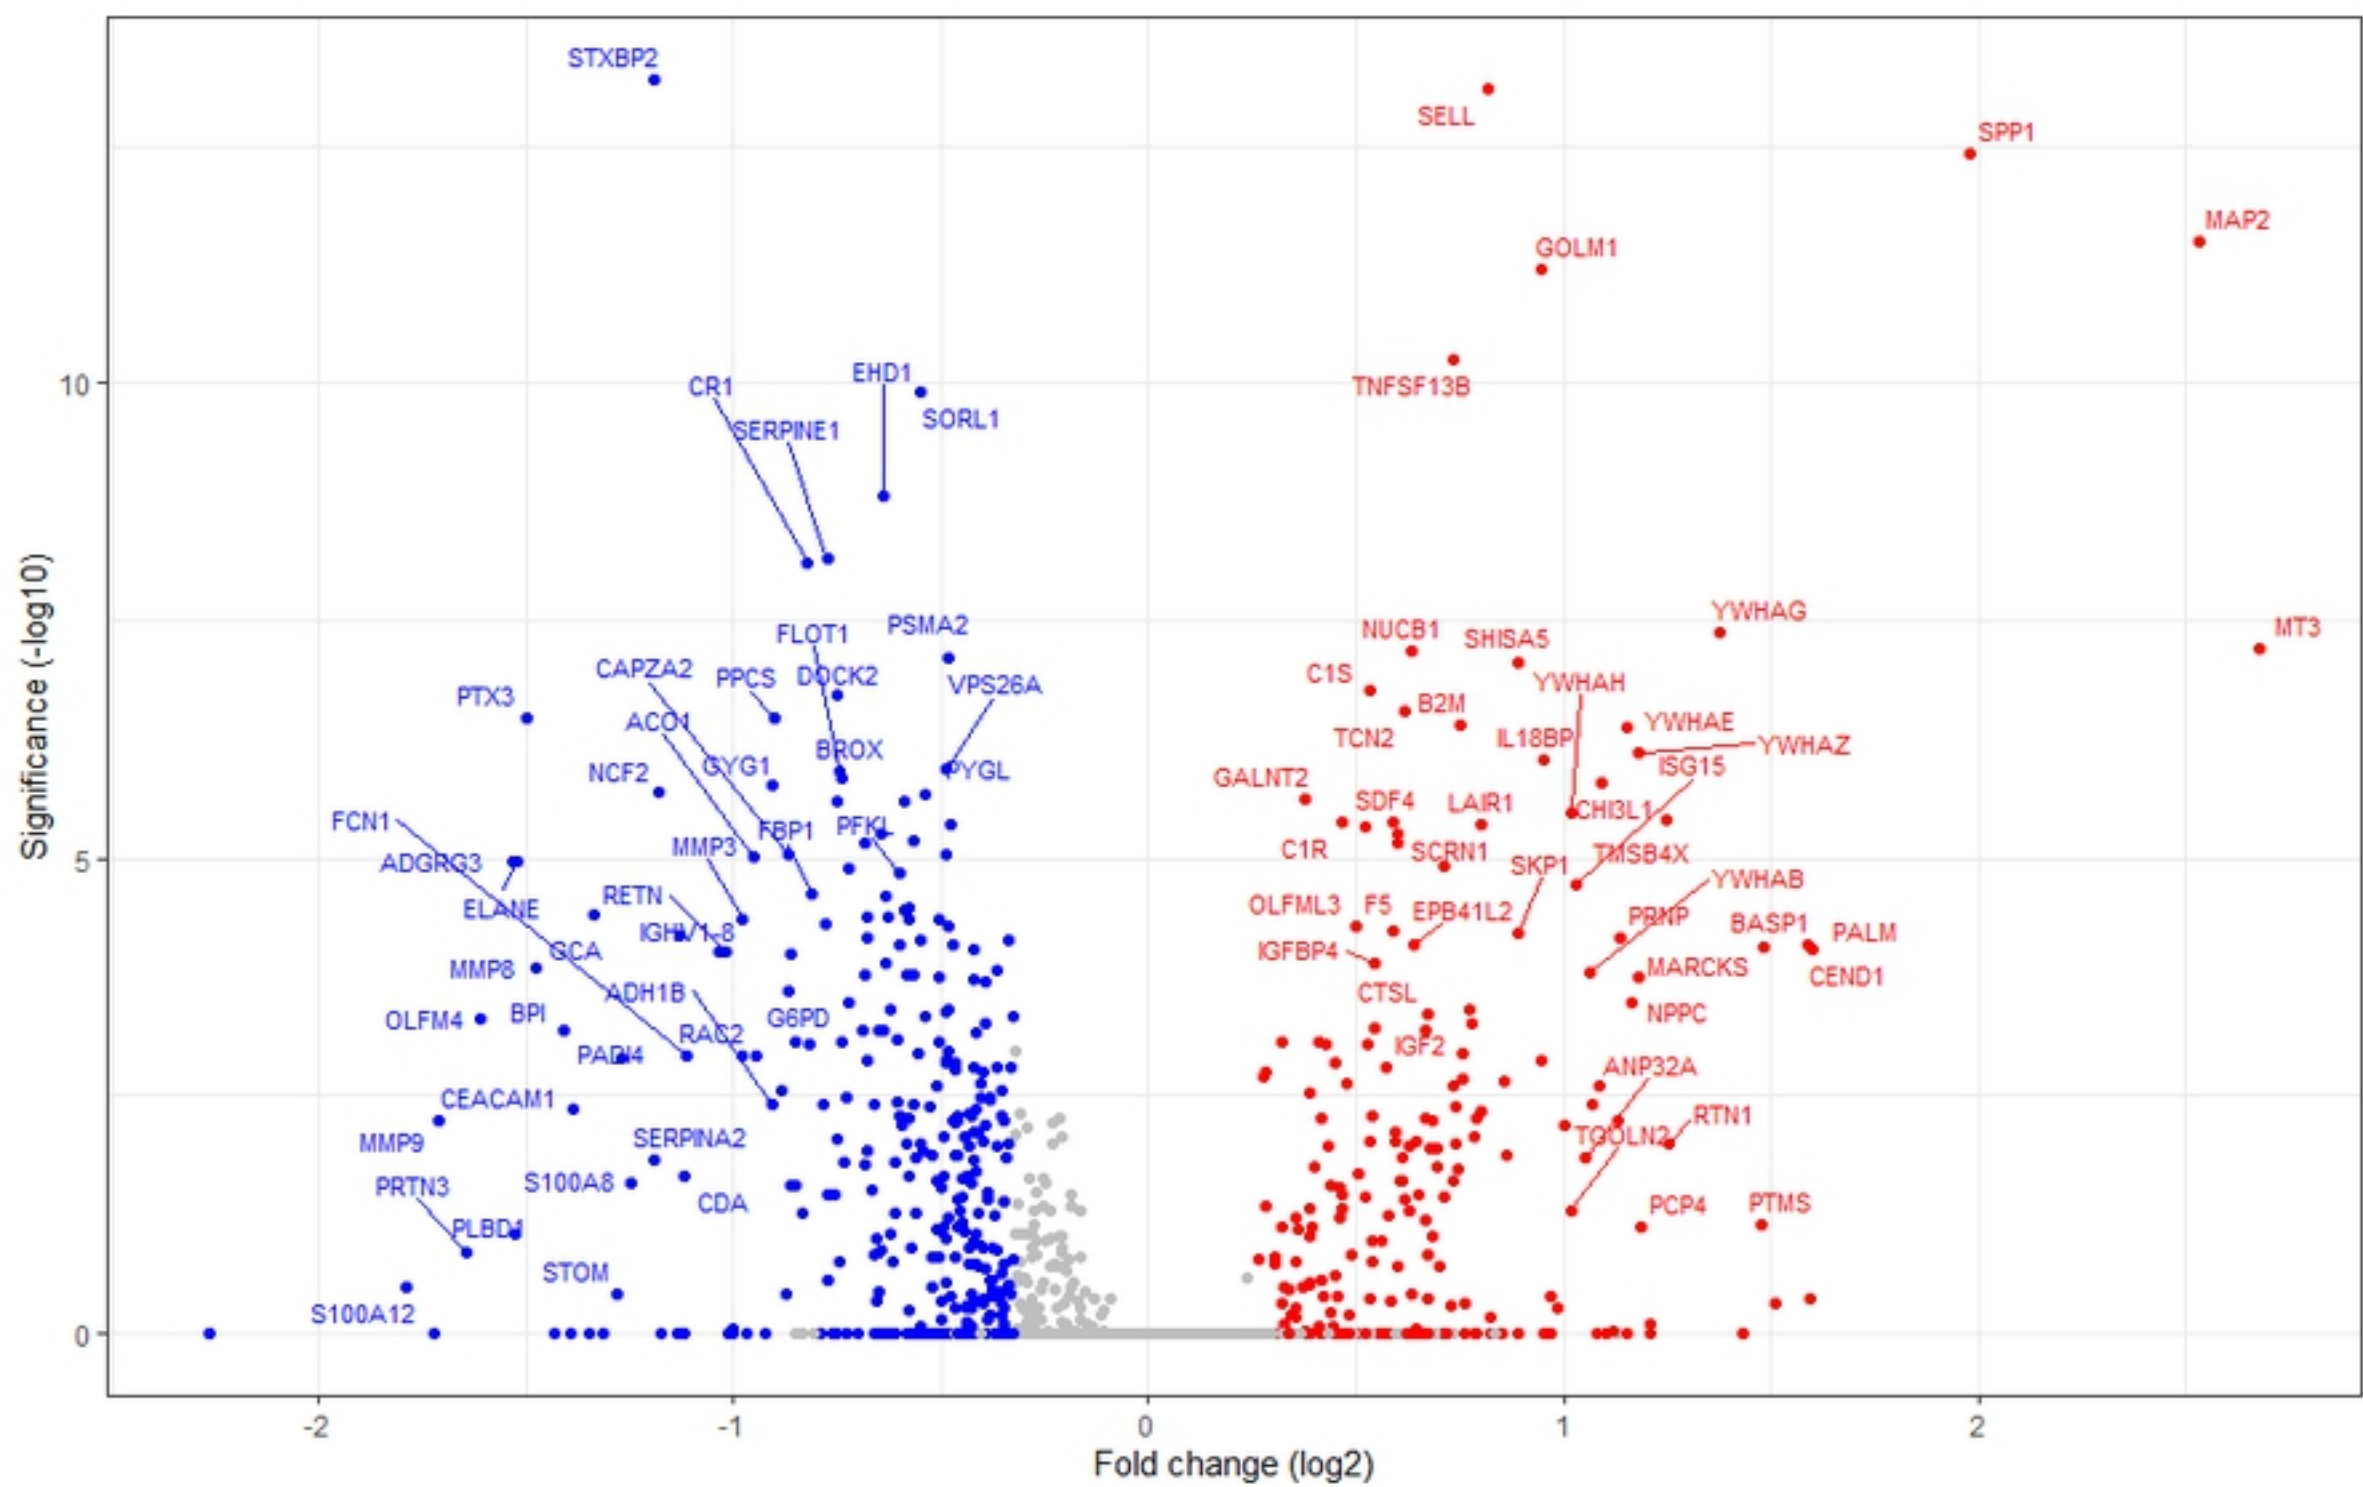



# Cluster Dendrogram

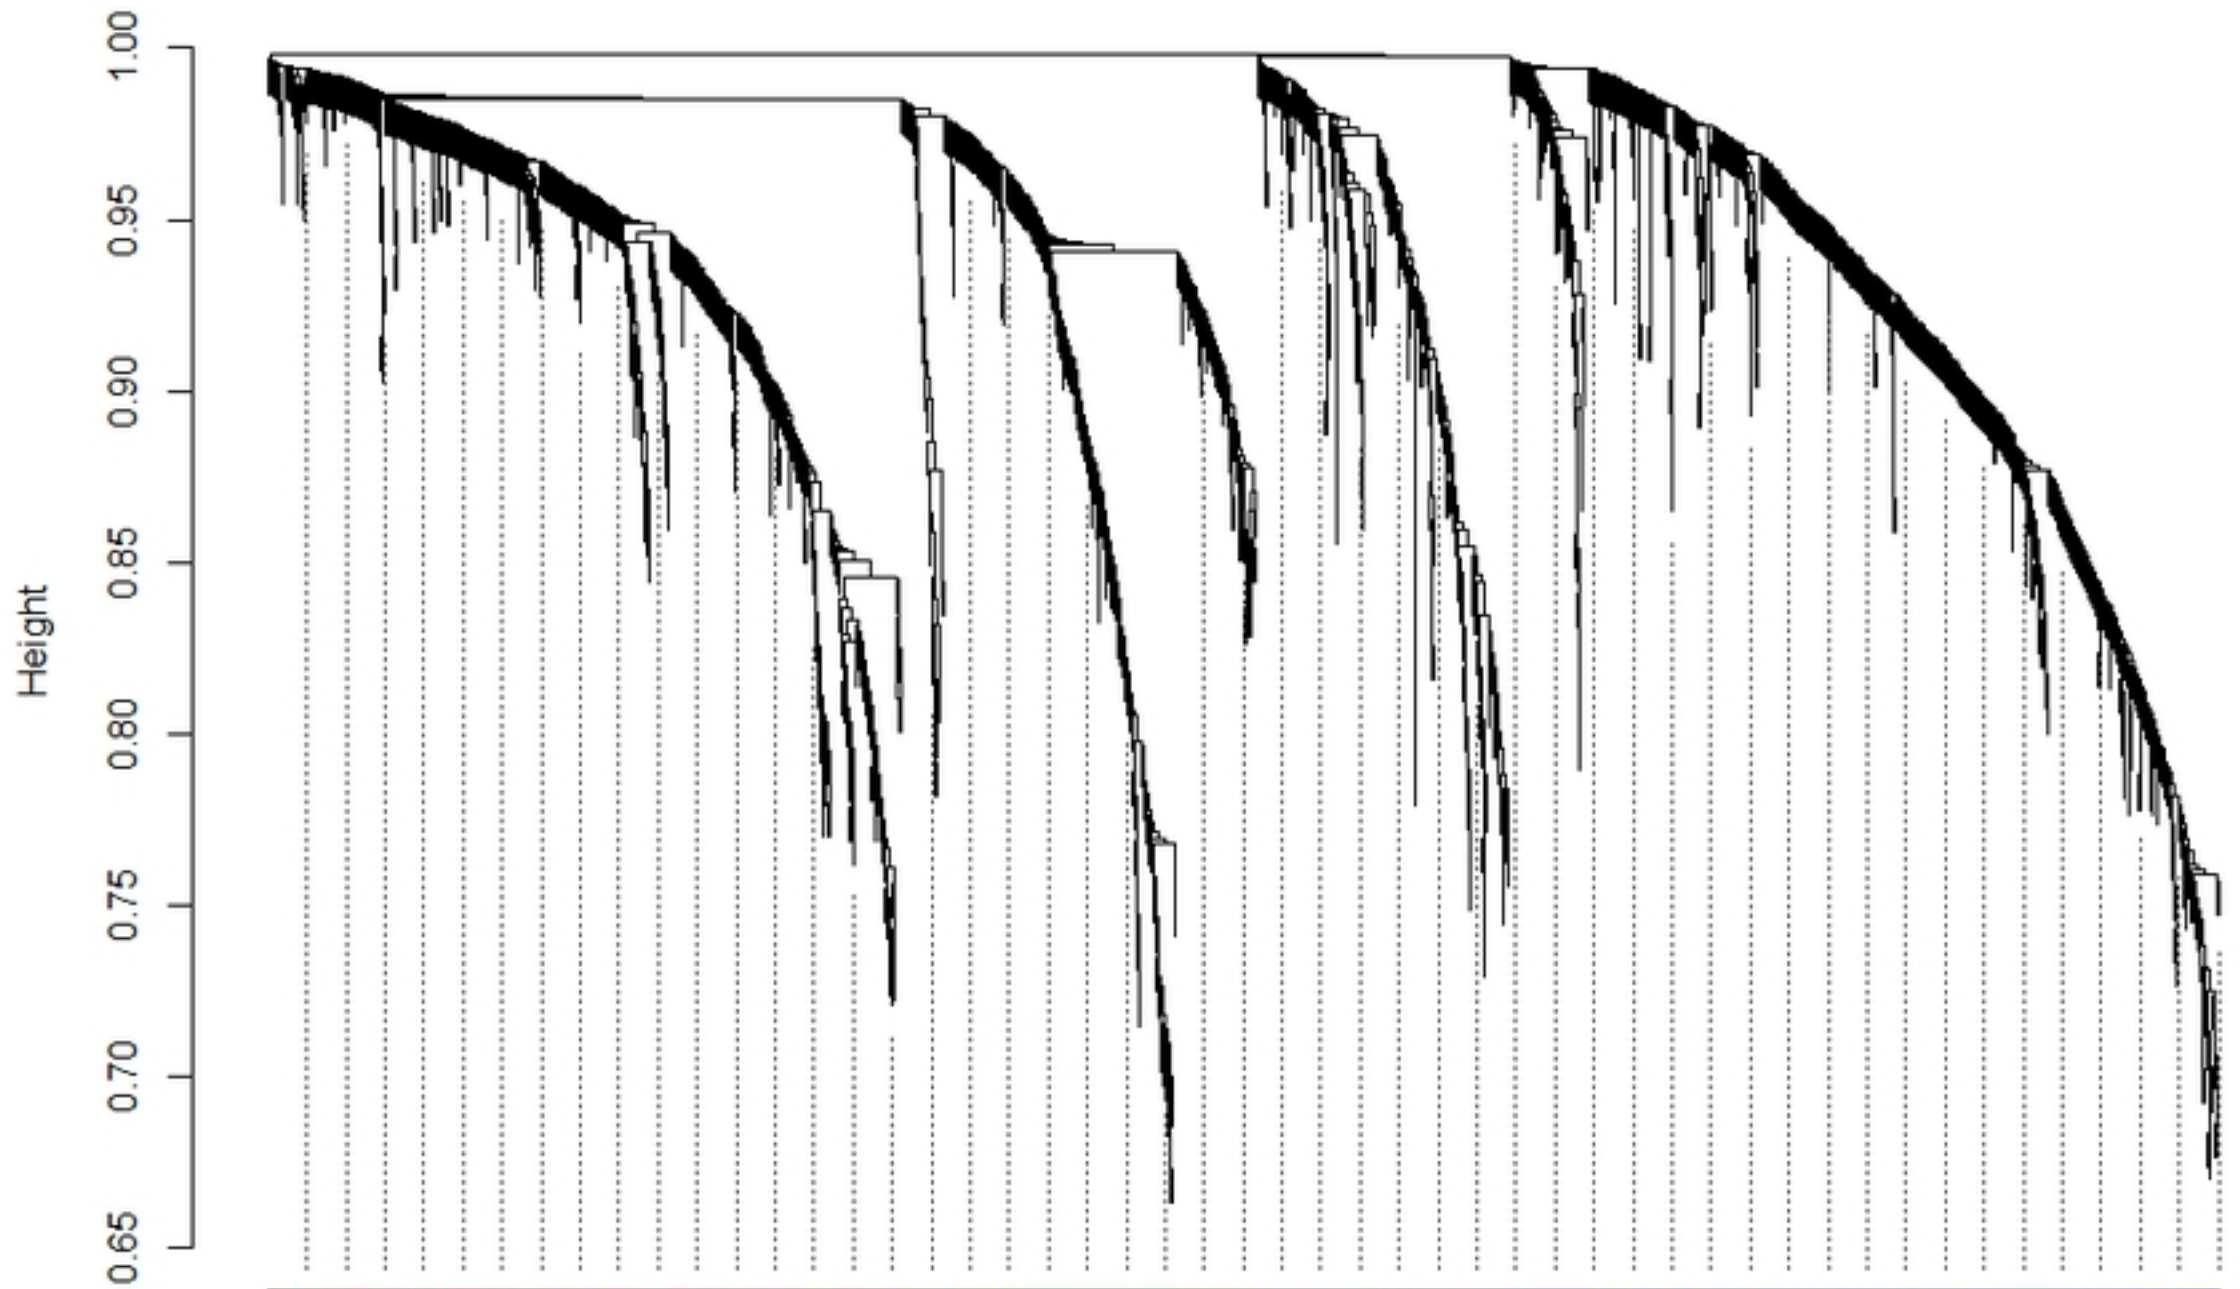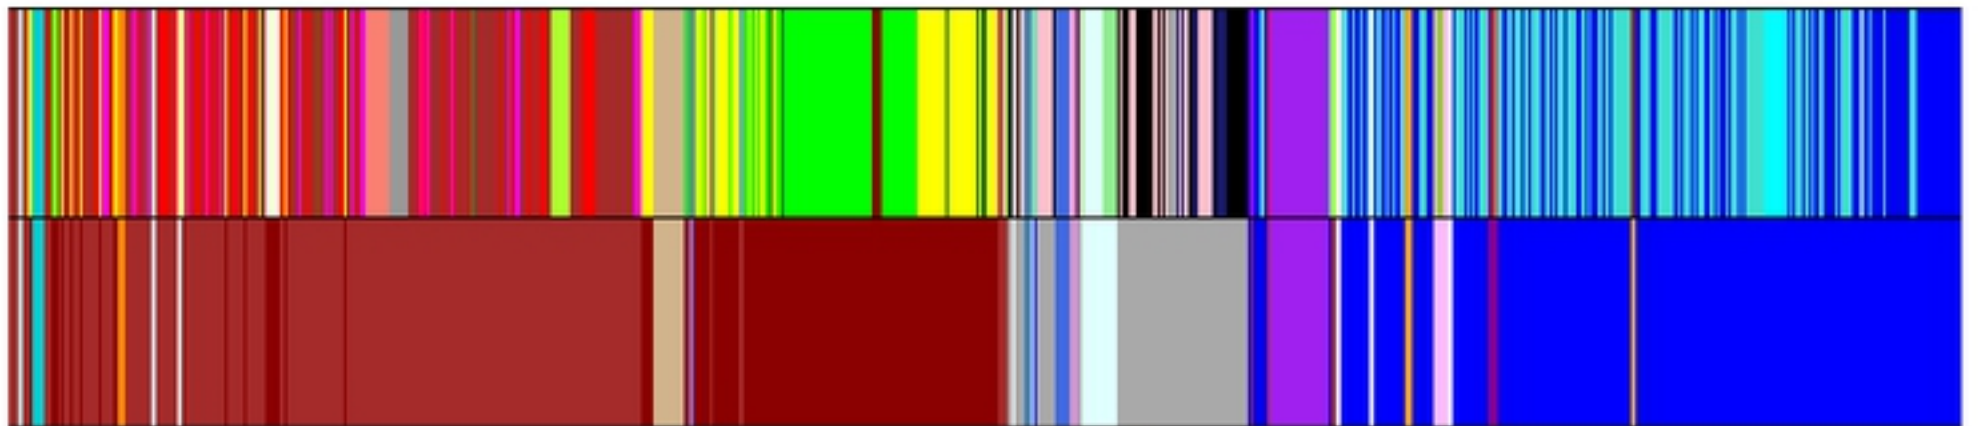

Dynamic Tree Cut

Merged dynamic

# Clustering of module eigengenes

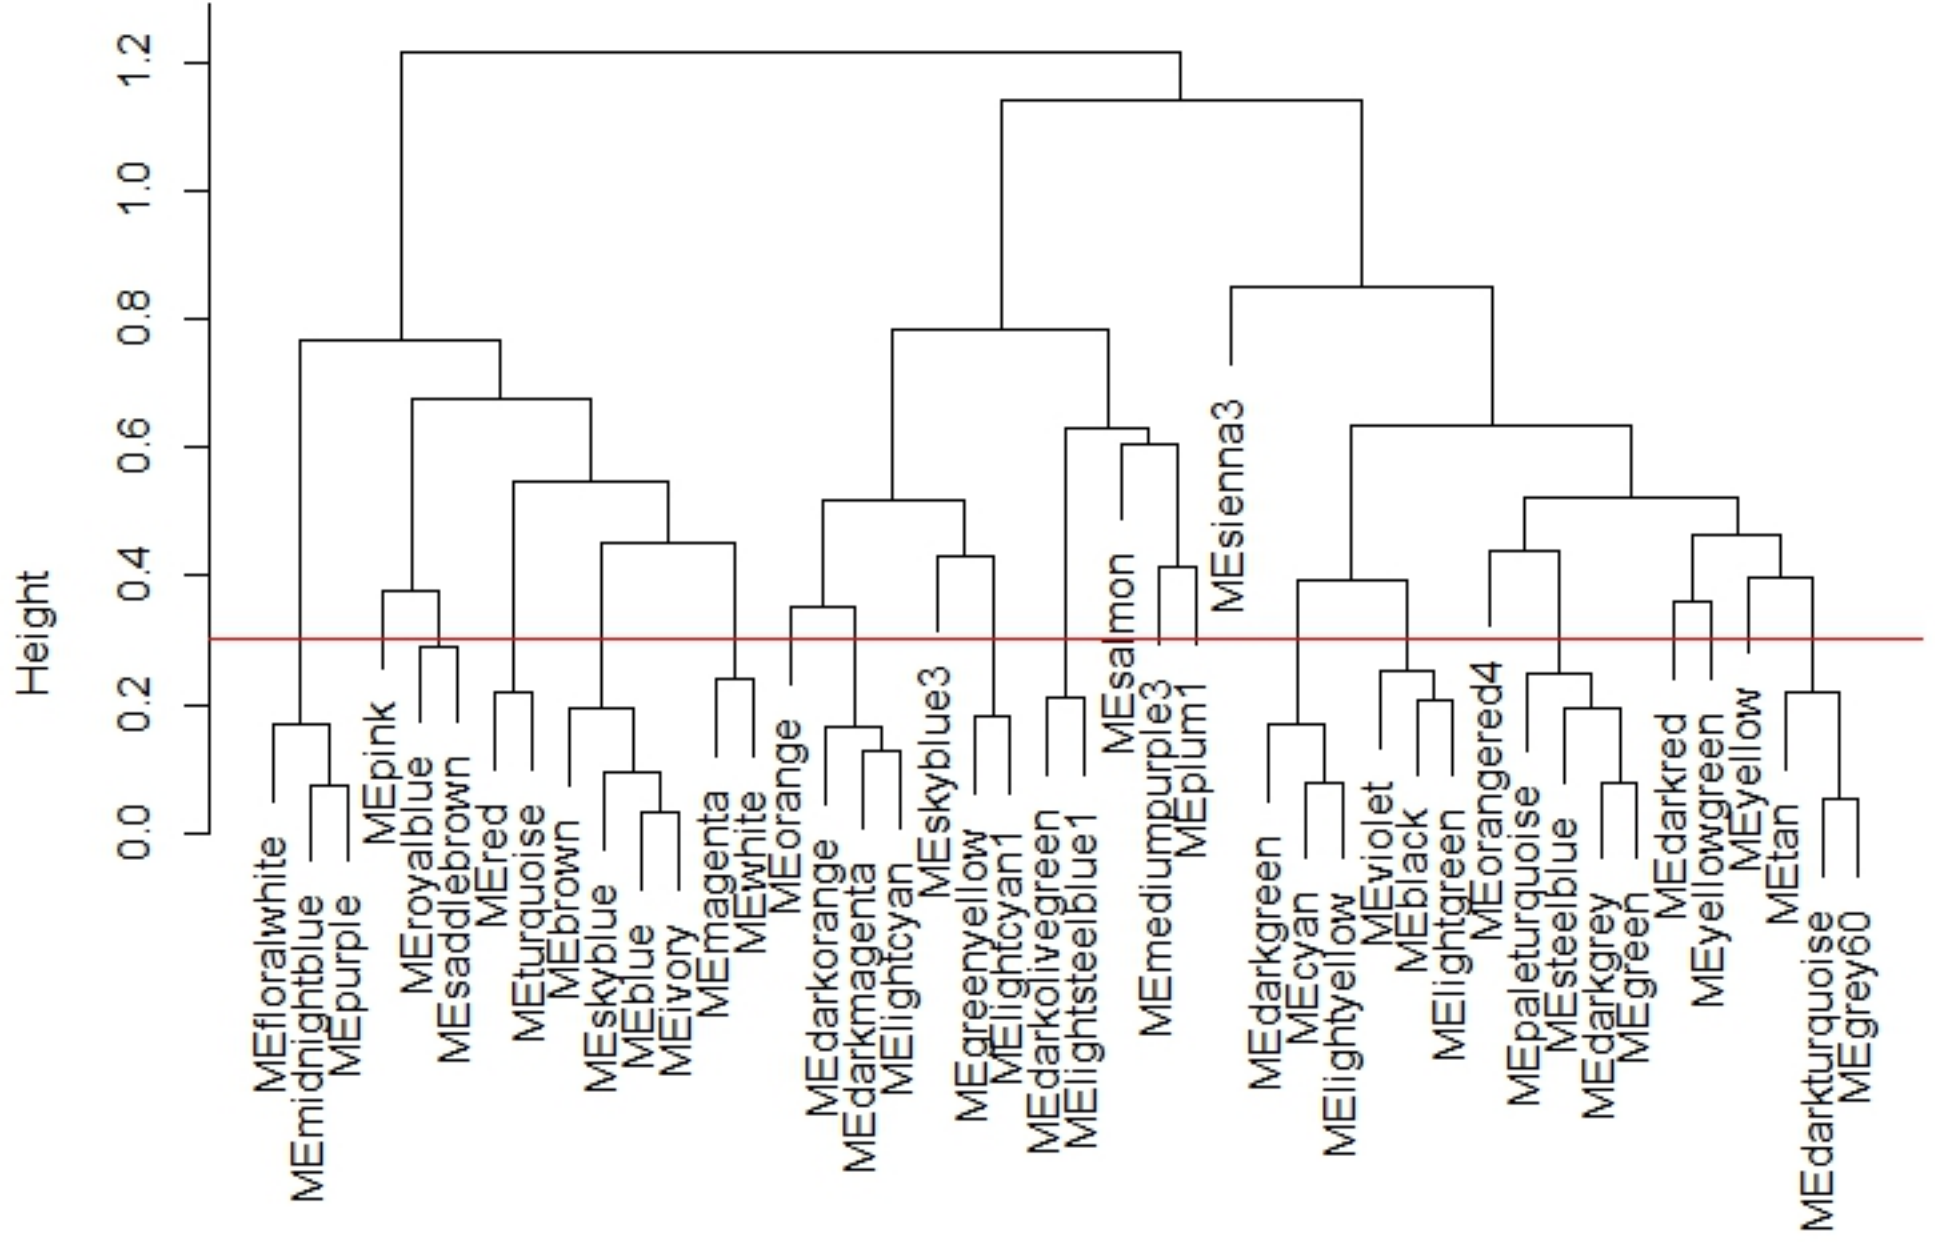

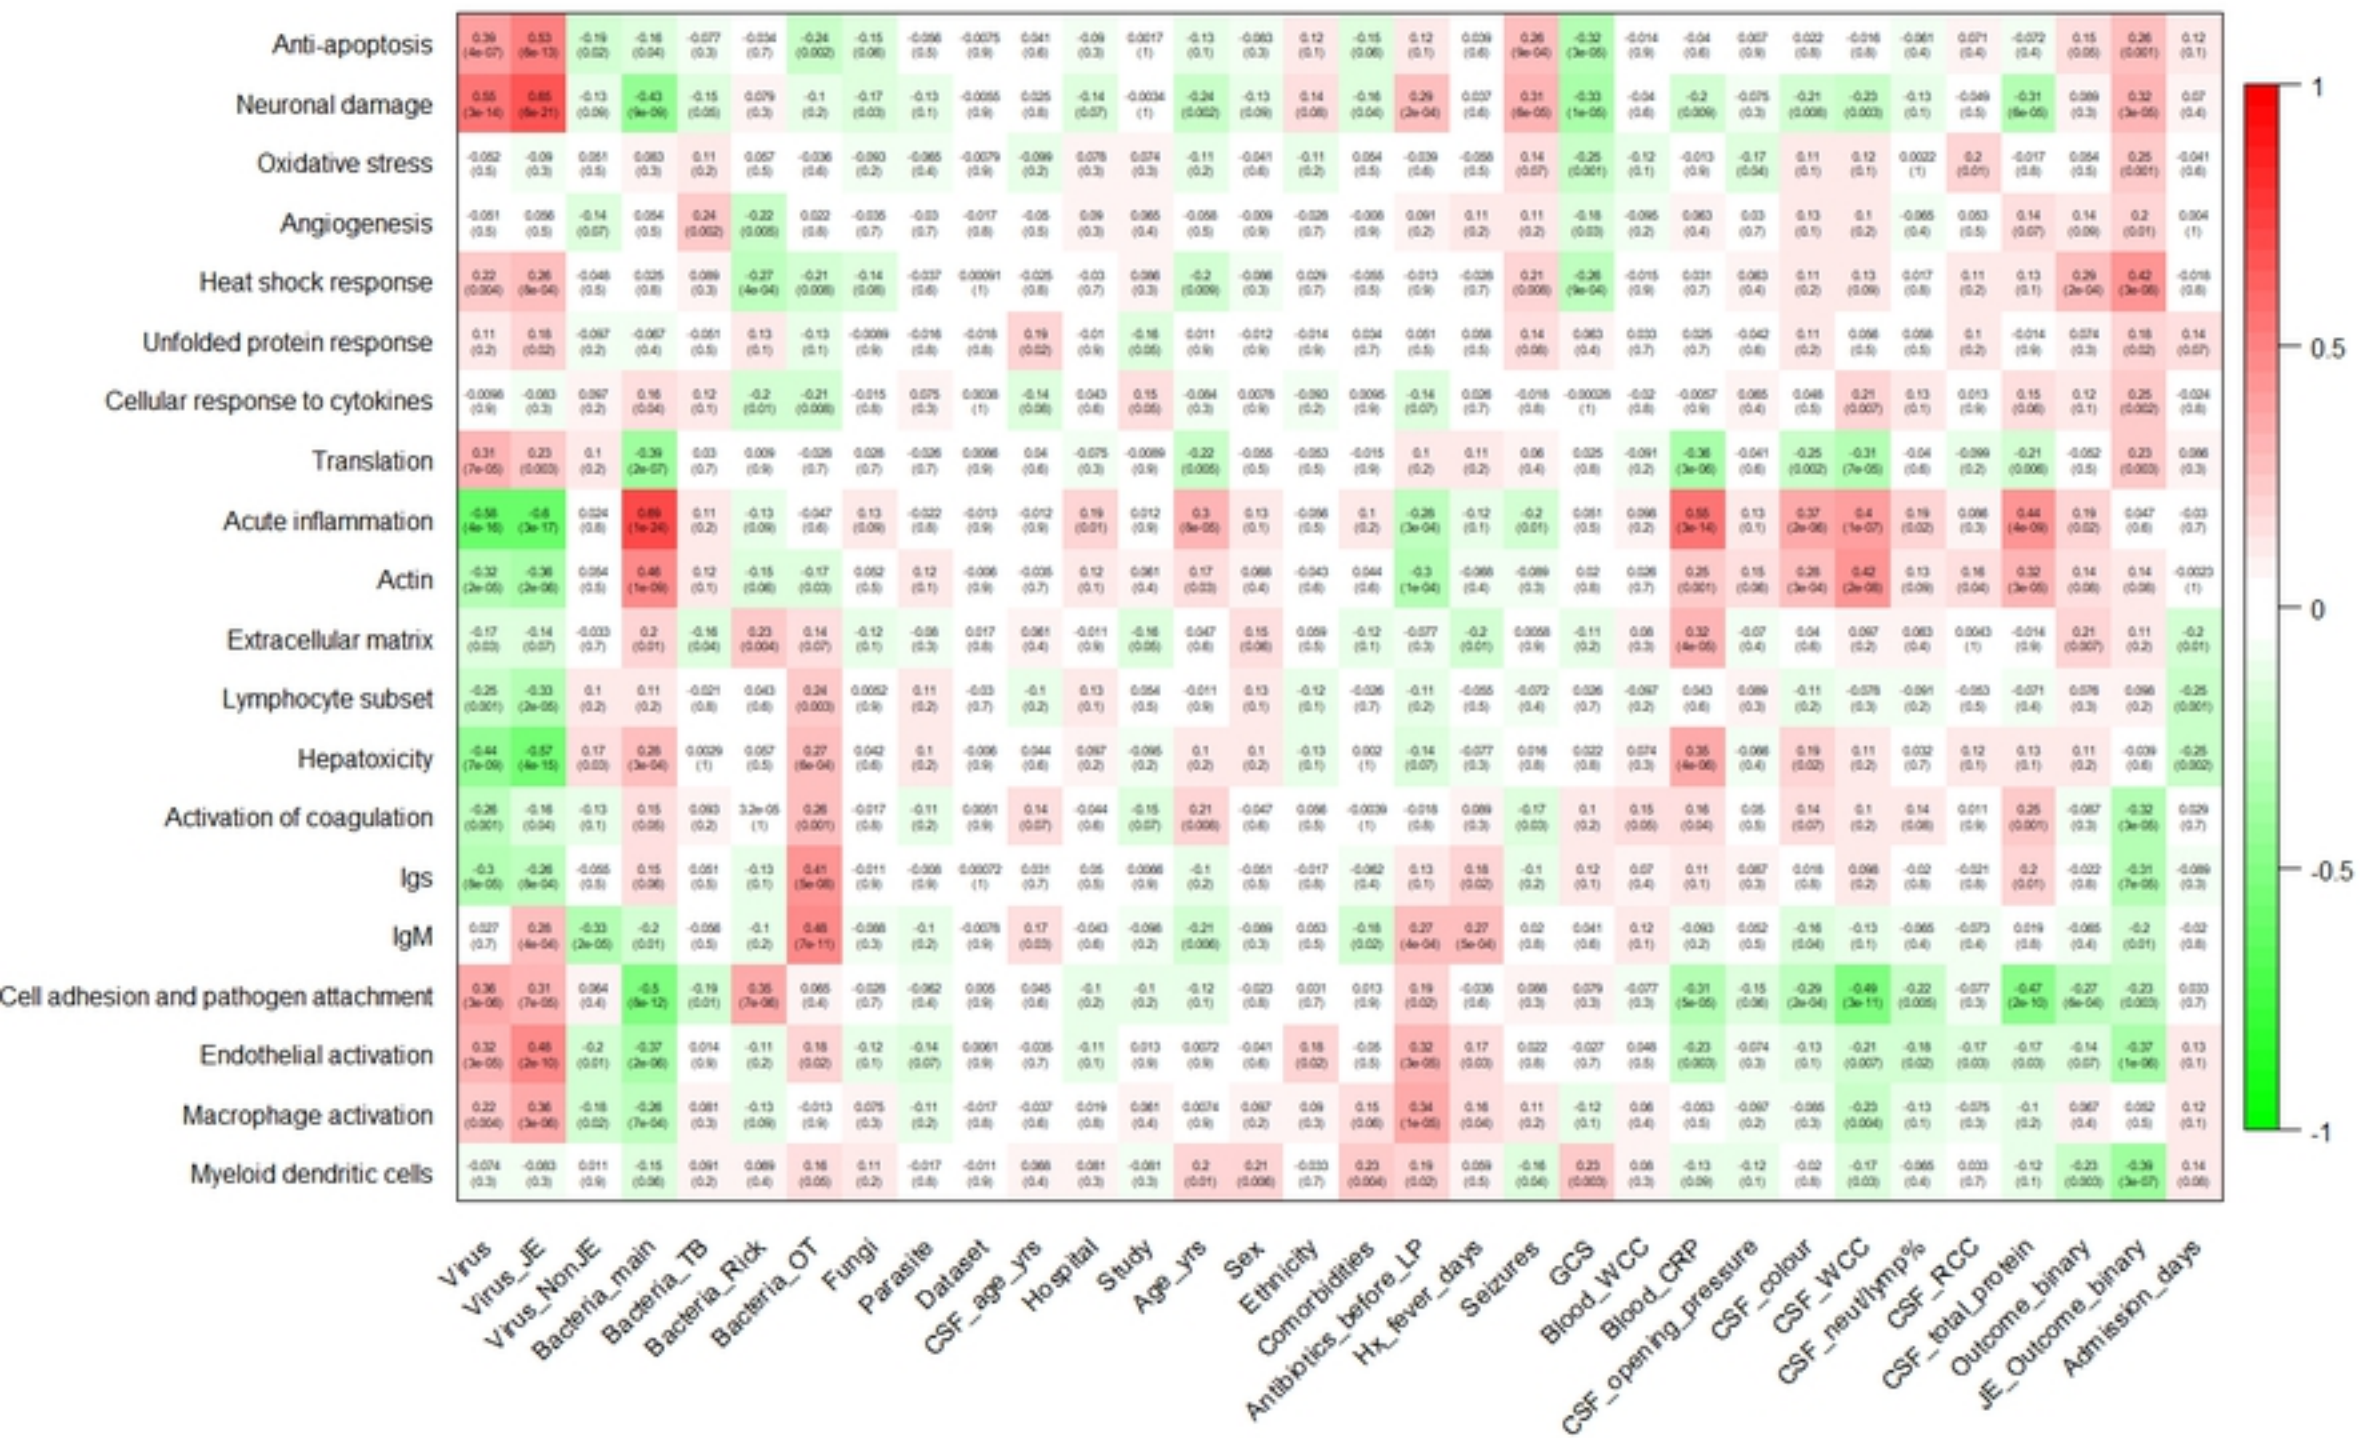

<https://doi.org/10.1101/2022.06.19.496758>  
(view)

CC-BY 4.0 International license

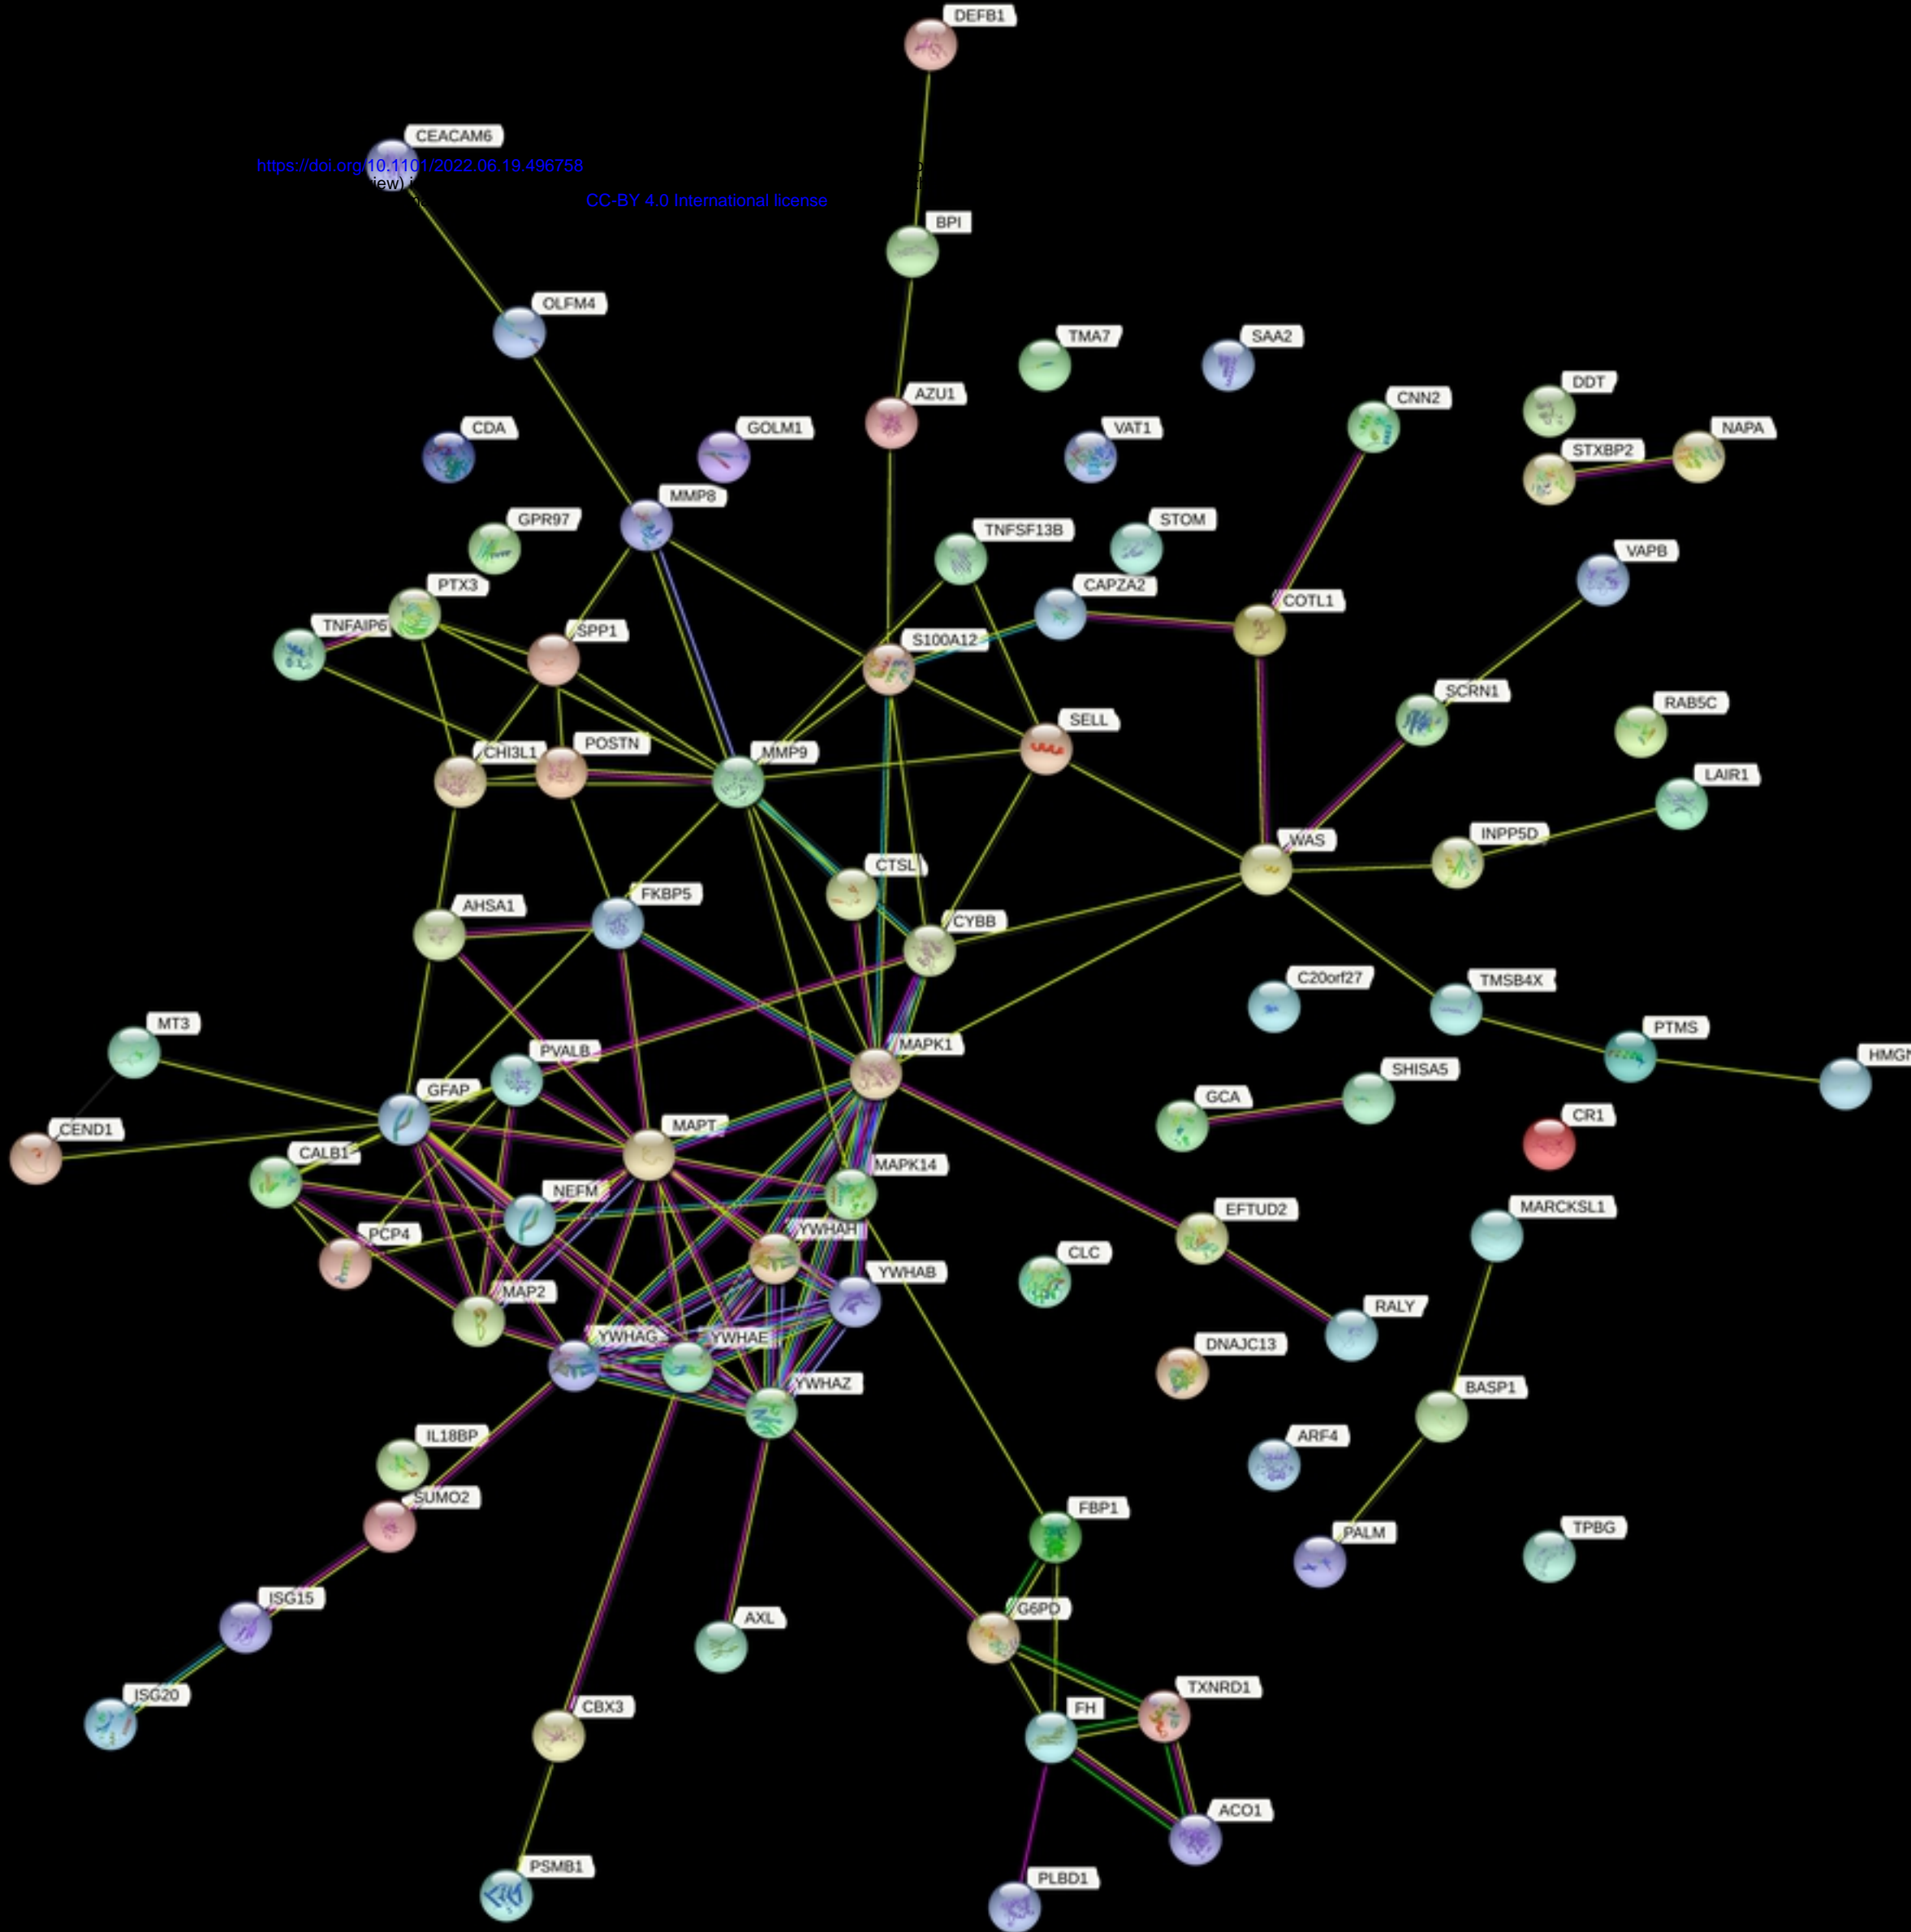

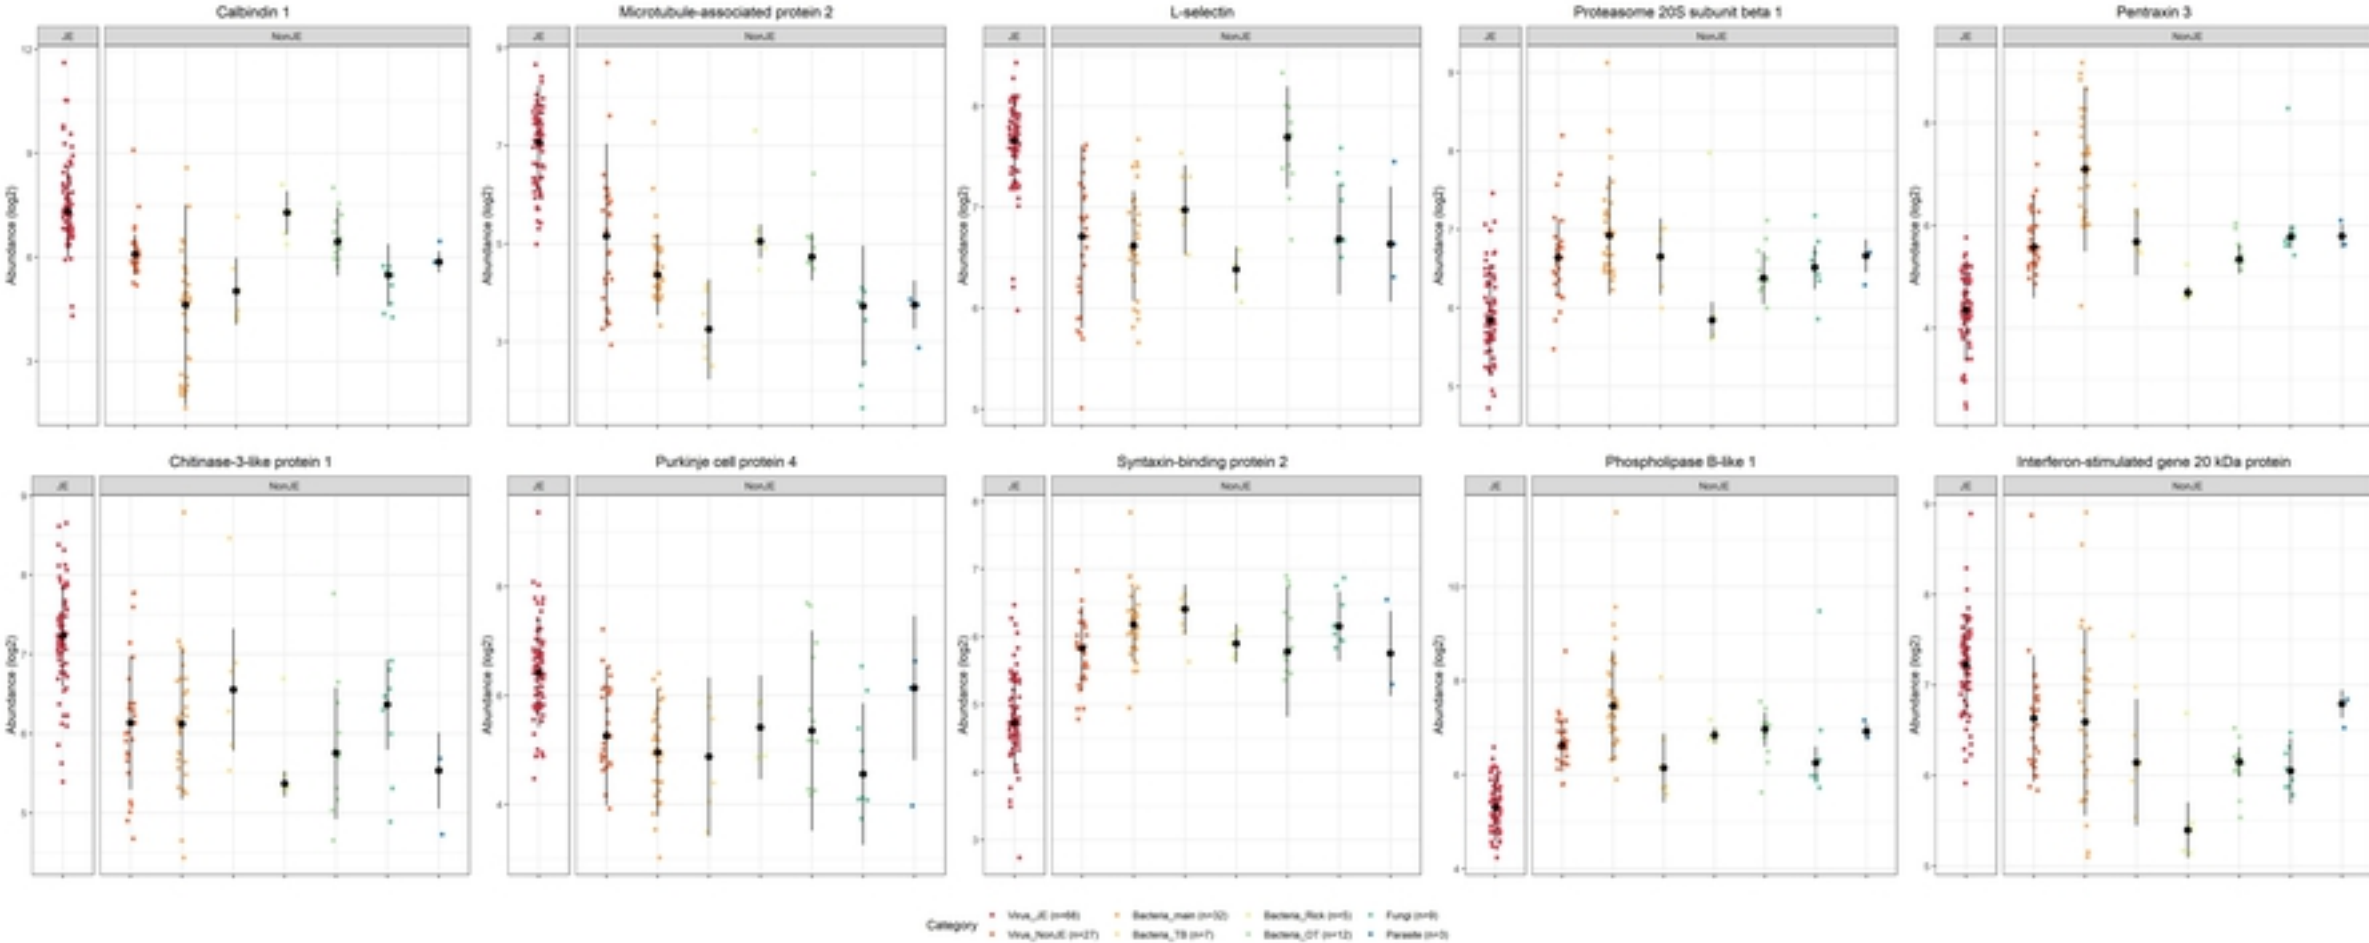

- ① Cerebrospinal fluid sample collection, characterisation and storage as part of the Laos central nervous system infection (CNSI) study. Identification of anti-Japanese encephalitis virus (JEV) IgM positive patient samples and an extensive range of controls of other confirmed CNSI.

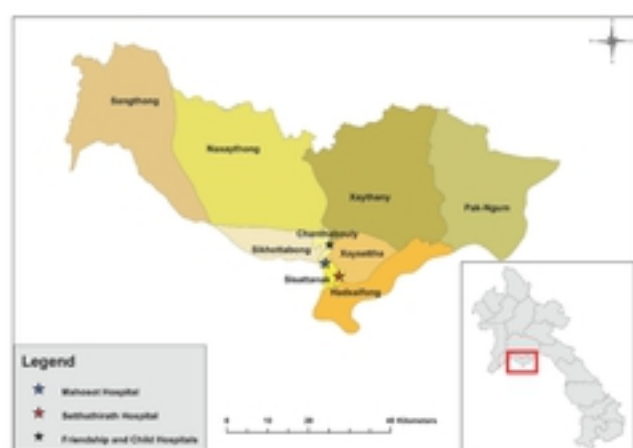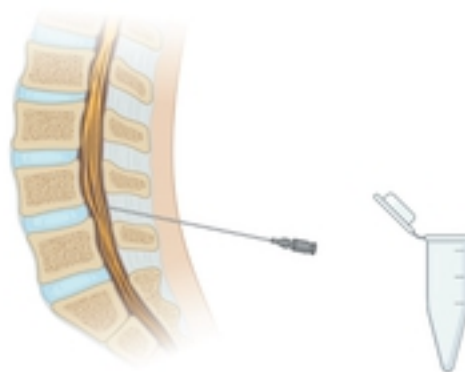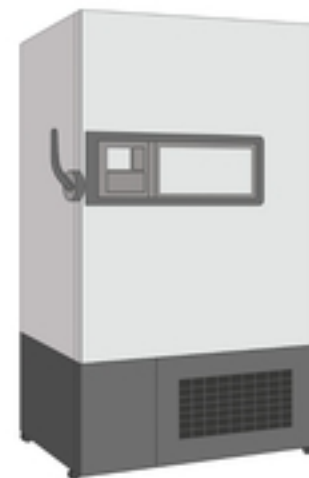

- ② Confirmation of JEV infection by gold-standard virus neutralisation testing in serum samples

bioRxiv preprint doi: <https://doi.org/10.1101/2022.06.19.496758>; this version posted June 21, 2022. The copyright holder for this preprint (which was not certified by peer review) is the author/funder, who has granted bioRxiv a license to display the preprint in perpetuity. It is made available under aCC-BY 4.0 International license.

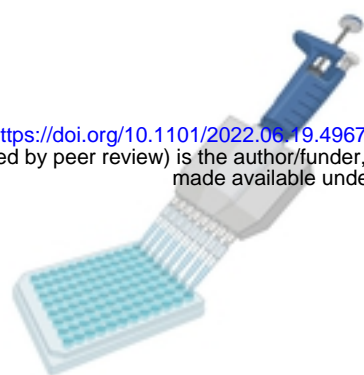

68 confirmed JE patient samples

+

95 confirmed non-JE patient samples

- Viral (27)
- Bacterial inc TB and Rickettsial (46)
- Fungal (9)
- Parasitic (3)

- ③ TMT labeling protocol

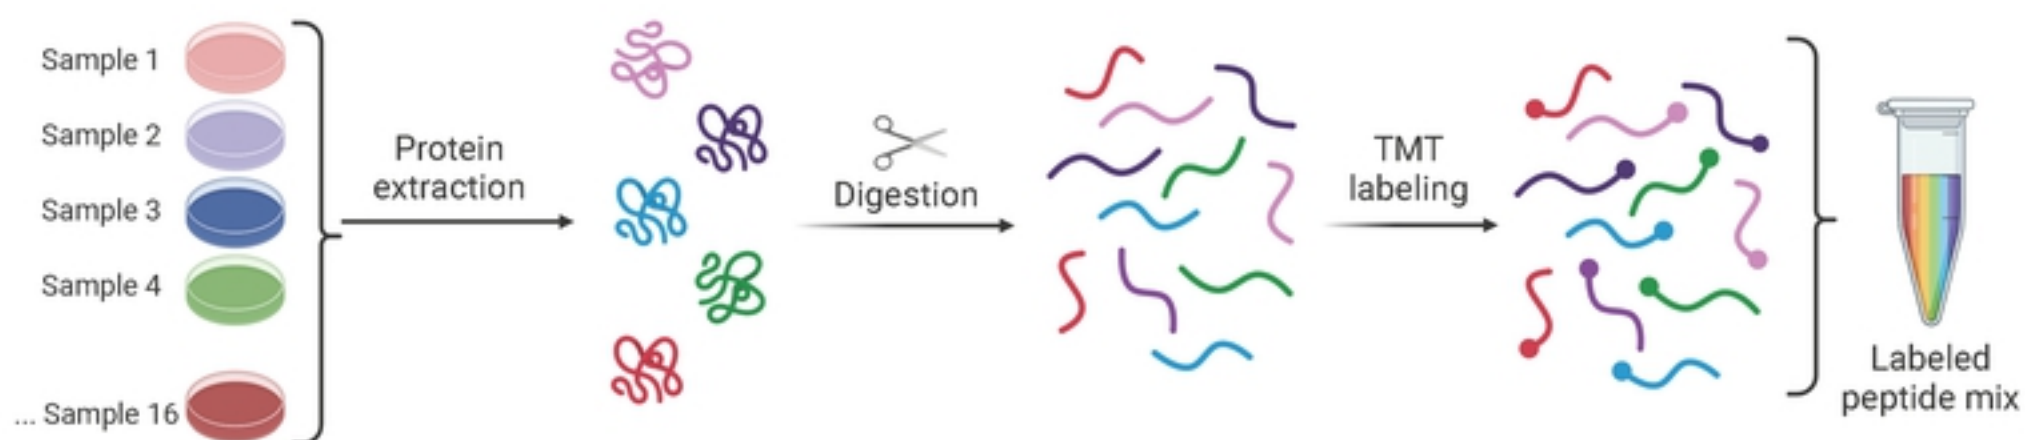

- ④ Liquid-chromatography mass-spectrometry processing, peptide identification and quantification

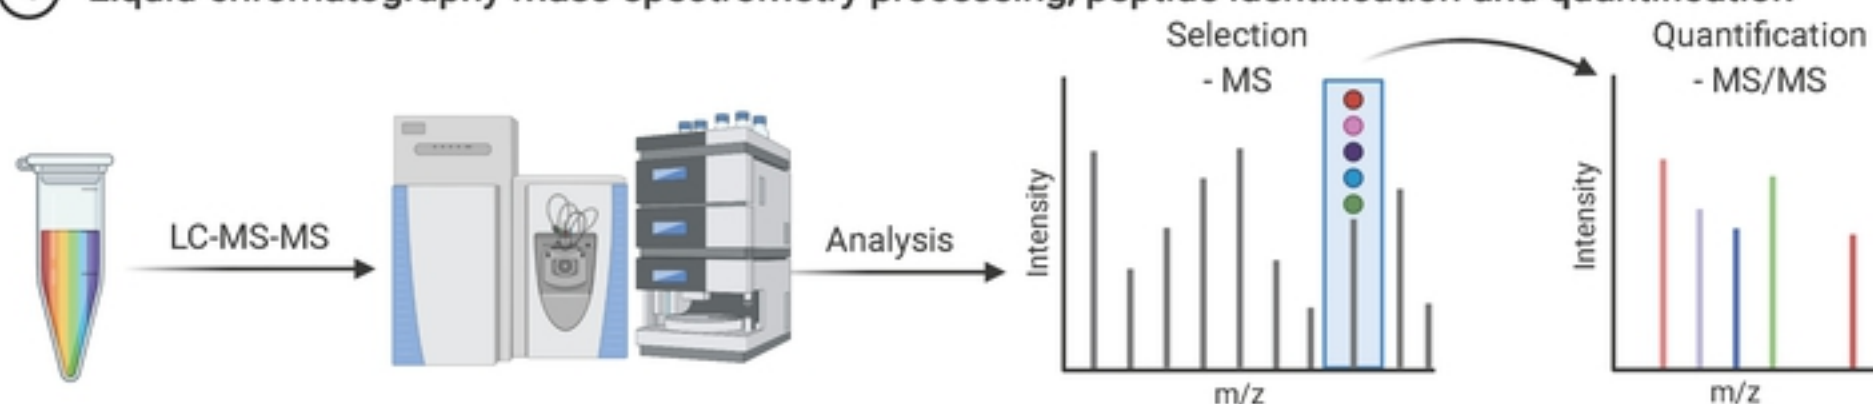

- ⑤ Data pre-processing and statistical analysis

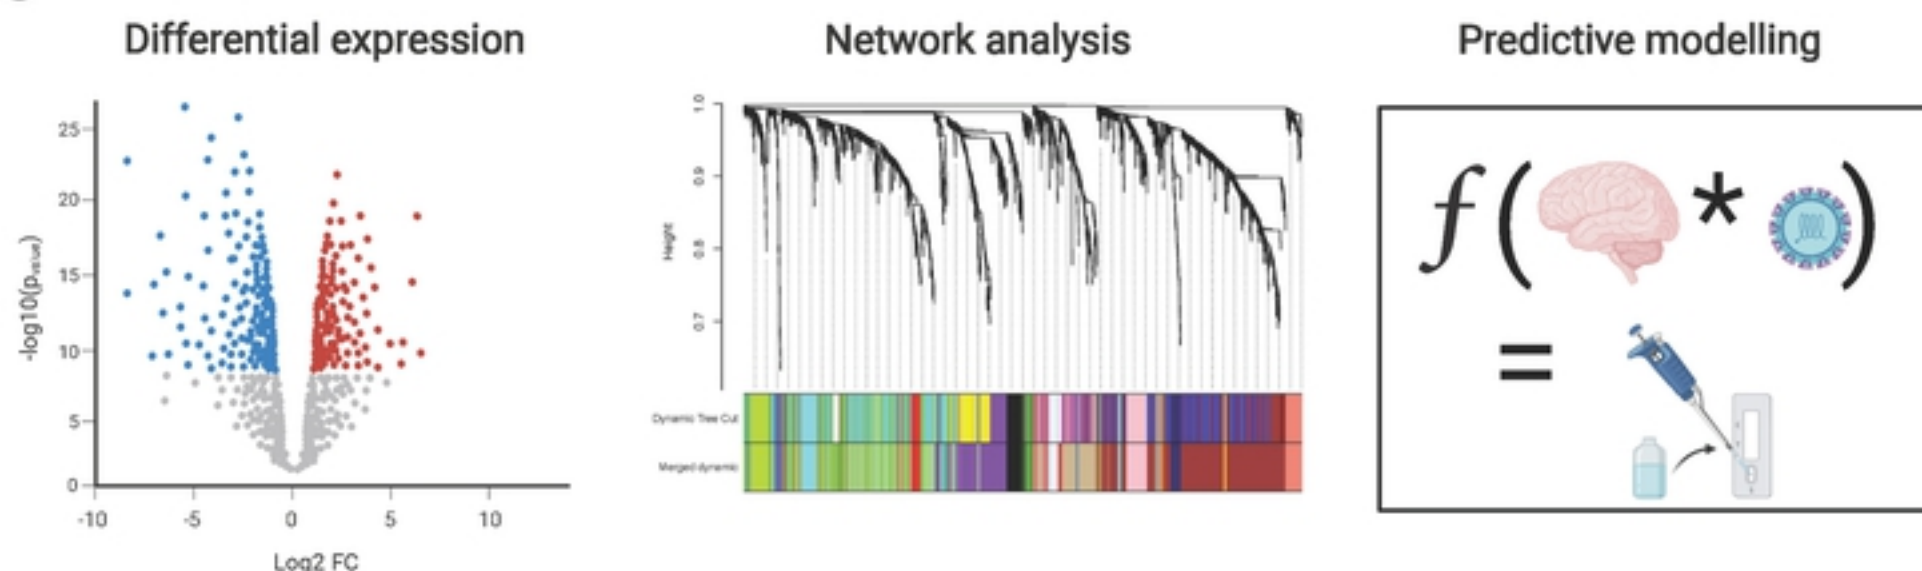

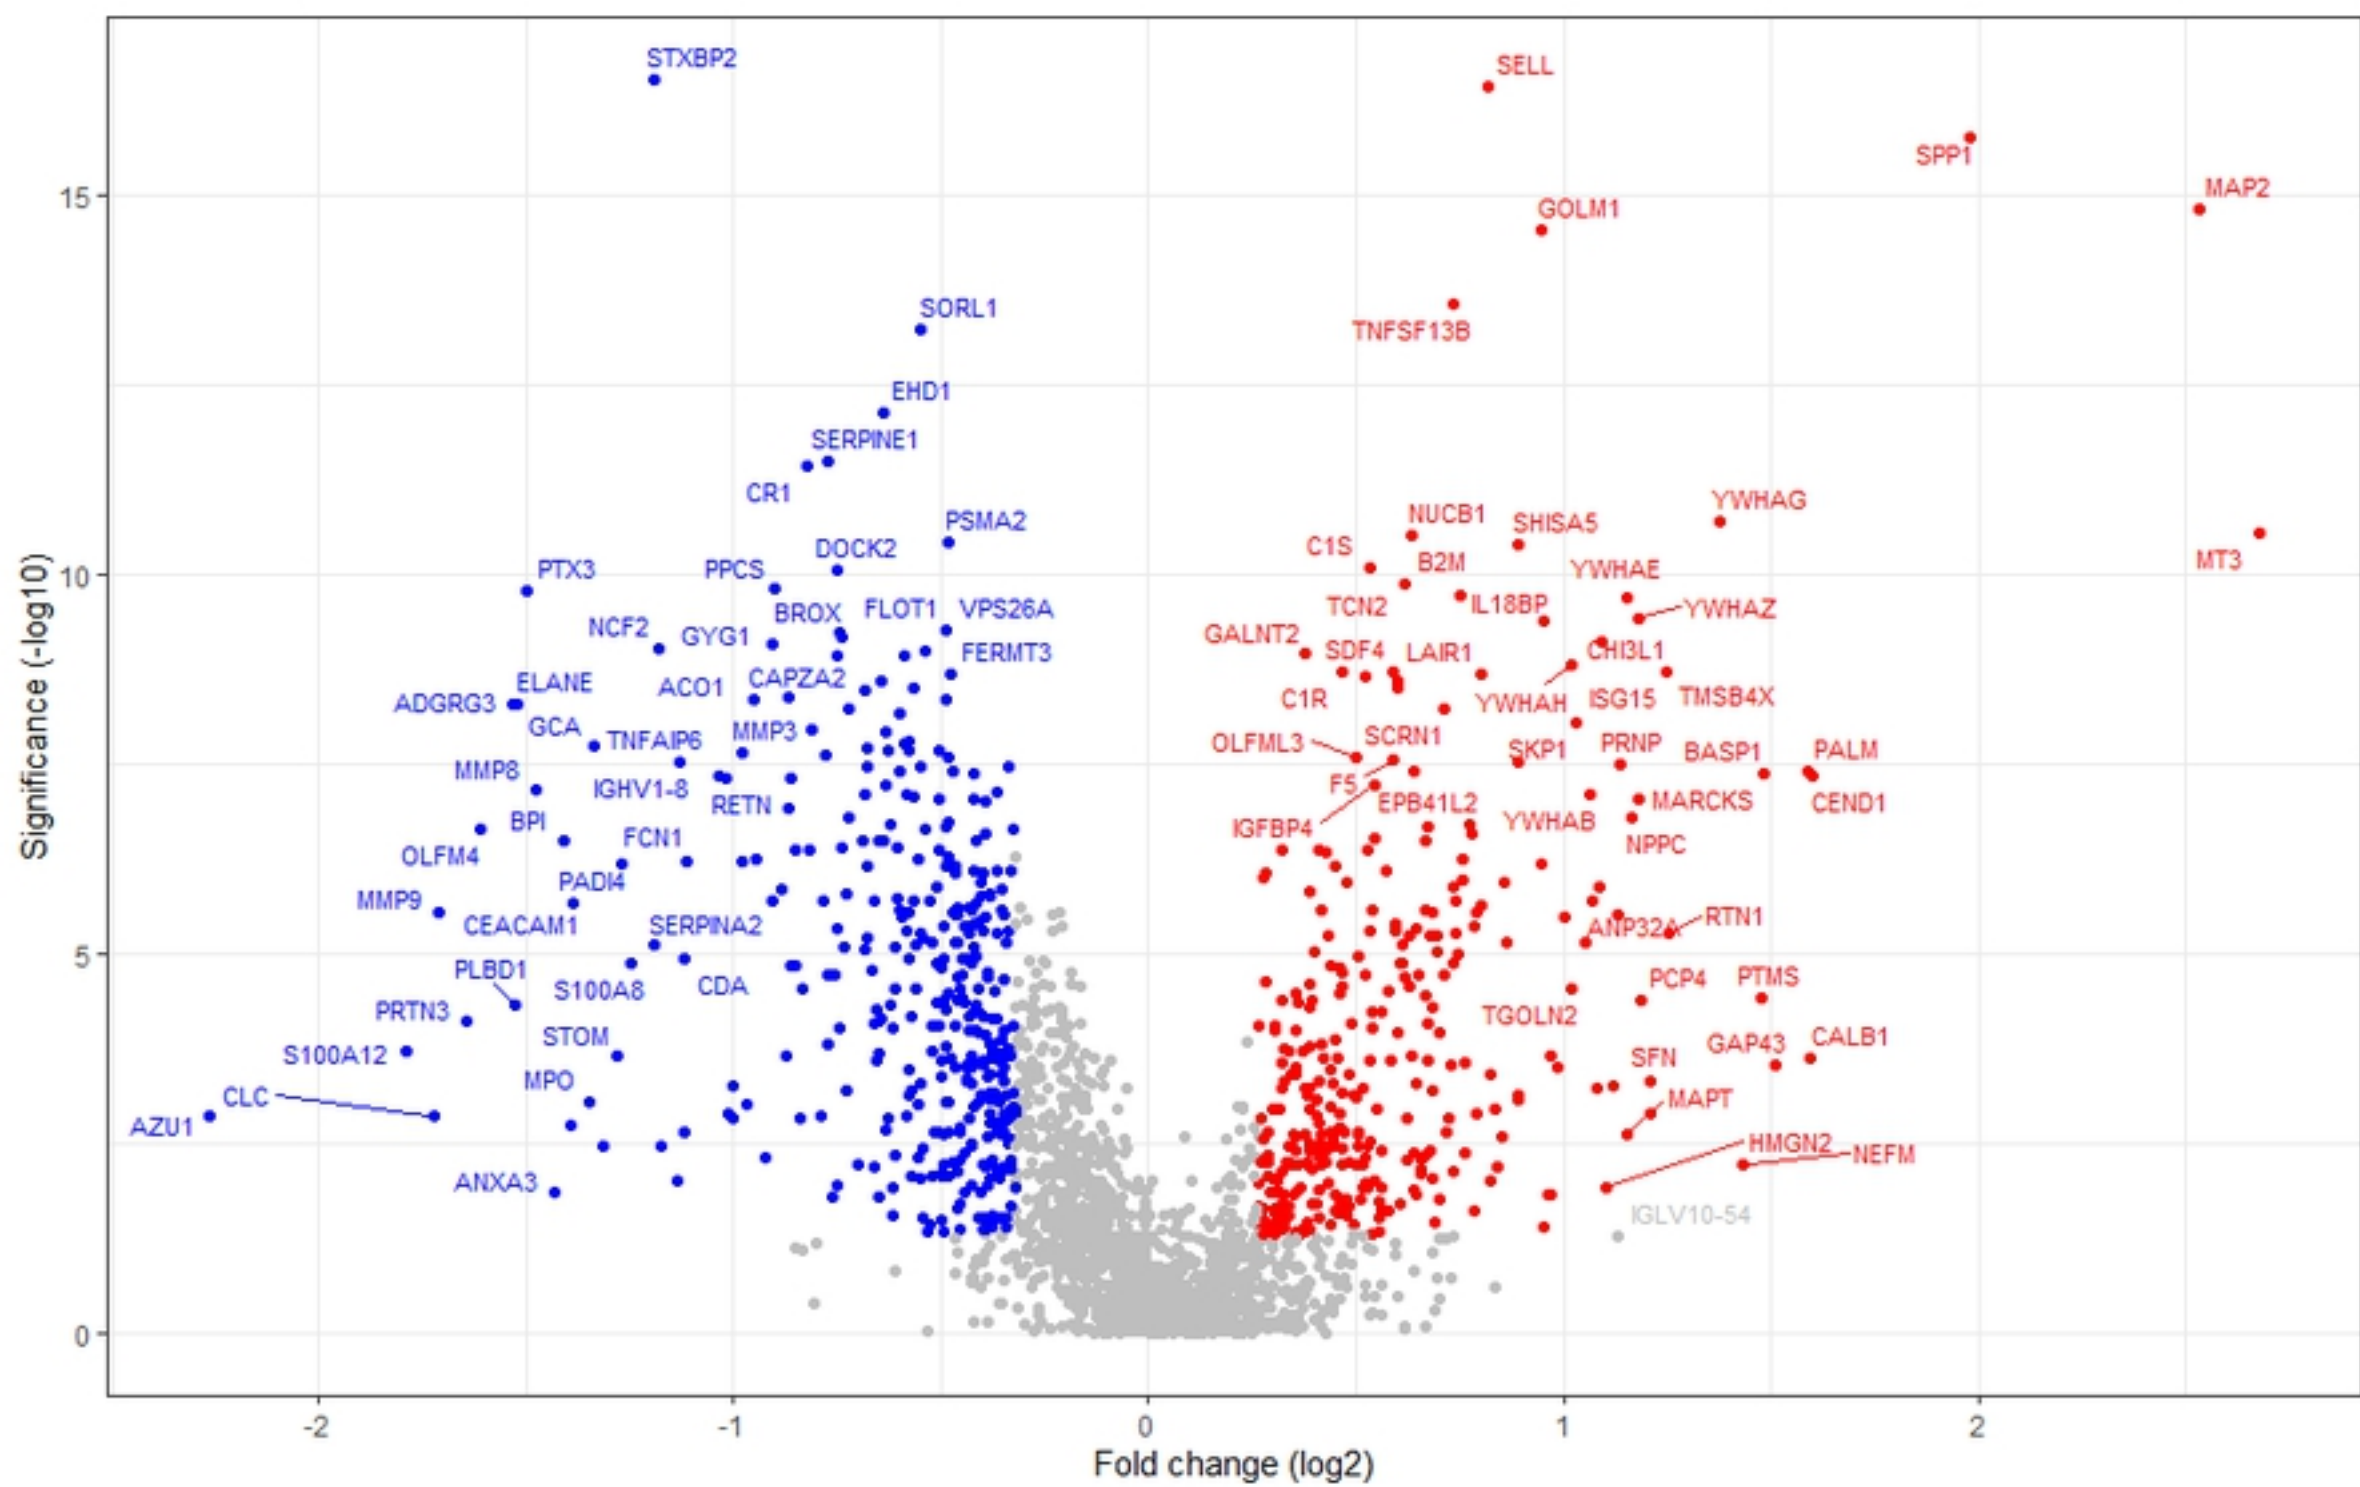

Source: https://www.biorxiv.org/content/10.1101/2022.06.19.496758v1.full.pdf
